# Supplementary material for: HDAC3 is a molecular brake of the metabolic switch supporting white adipose tissue browning
Source: PubMed Central journal article supplement (PMC5522415; doi:10.1038/s41467-017-00182-7), 2017-07-21
Supplement: 41467_2017_182_MOESM1_ESM.pdf [file 41467_2017_182_MOESM1_ESM.pdf]

File Name: Supplementary Information

Description: Supplementary Figures and Supplementary Tables

File Name: Peer Review File

## Supplementary Figure 1

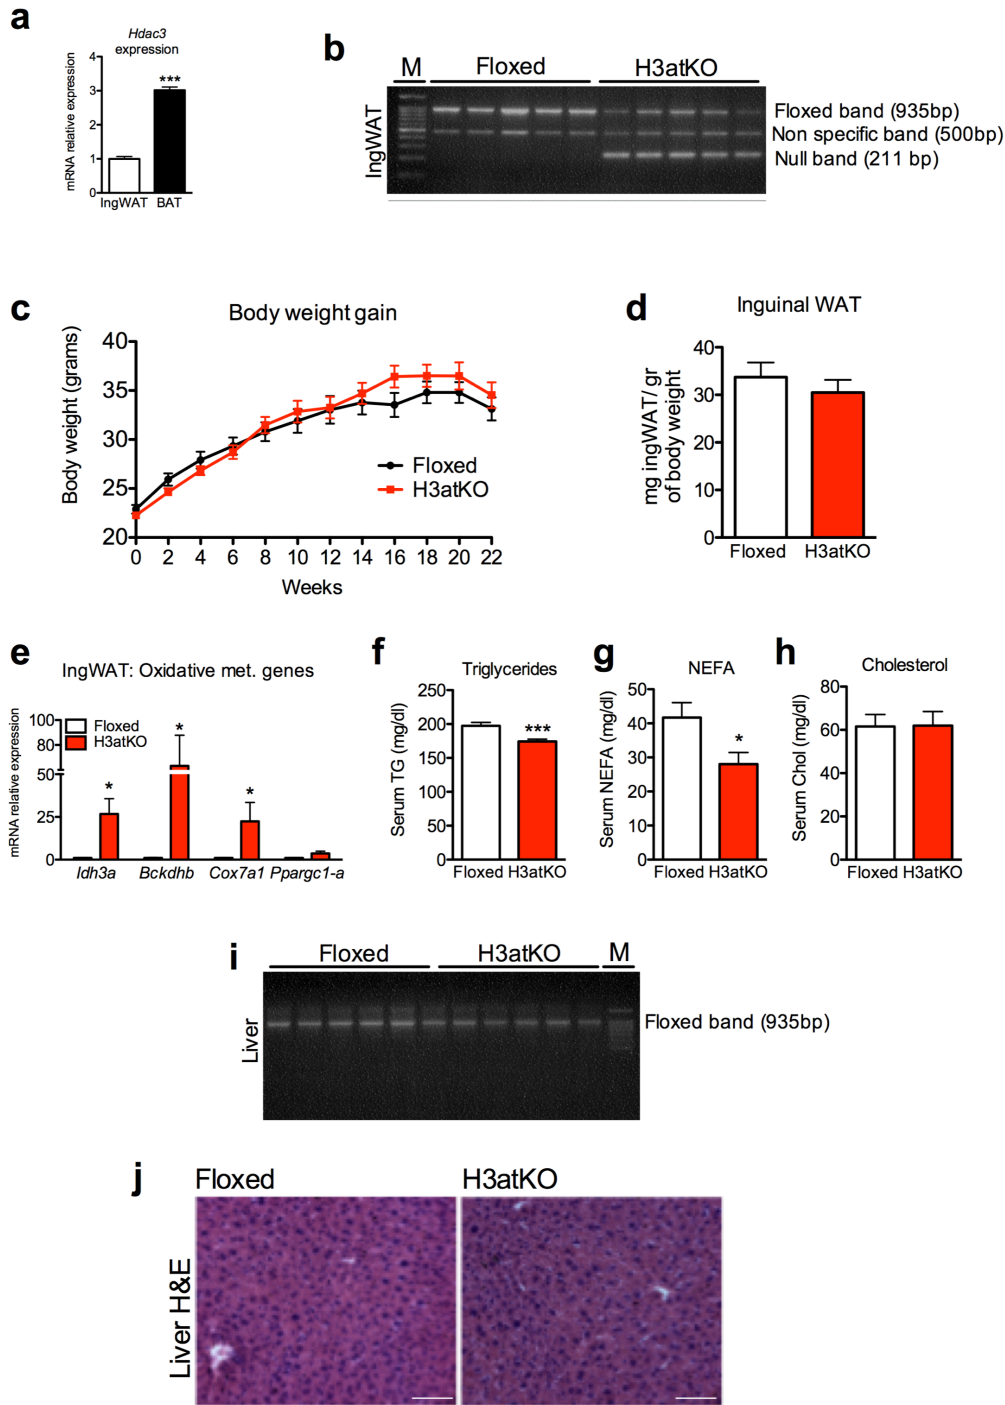

Supplementary Figure 1. Impact of *Hdac3* KO on inguinal WAT, serum lipids and liver

**a)** *Hdac3* expression in Inguinal WAT and BAT; **b)** Deletion of *Hdac3* in IngWAT detected by PCR; **c)** Body weight gain of floxed and H3atKO mice (n=11 per group); **d)** Inguinal fat weight of floxed and H3atKO mice (n=11 per group); **e)** Gene expression analysis of oxidative metabolism genes in inguinal WAT of floxed and H3atKO mice (n=9-11 per group); **f, g, h)** Fasting levels of triglycerides, cholesterol and non-esterified fatty acids in serum from floxed and H3atKO mice (n=11 per group); **i)** *Hdac3* in liver (negative control for deletion) of floxed and H3atKO mice detected by PCR; **j)** Hematoxylin and eosin staining of livers from *Hdac3* floxed and knock out mice fed LFD, scale bar is 100µm.

Data are presented as mean ± SEM. Statistical analysis: Student's t test, \*p<0.05, \*\*\*p<0.001.

## Supplementary Figure 2

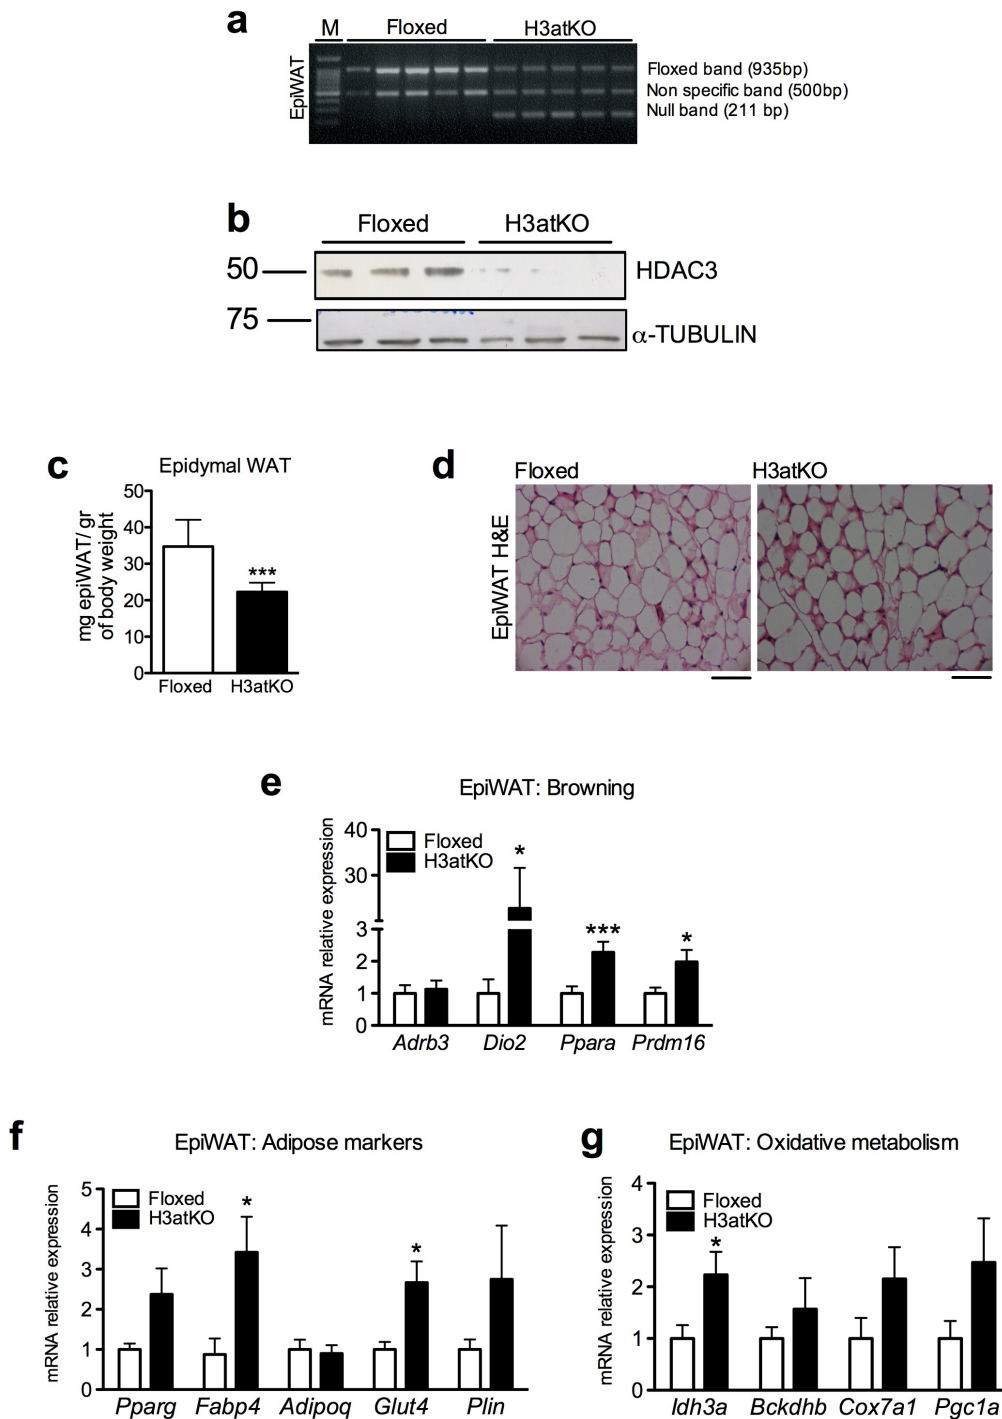

Supplementary Figure 2. Impact of *Hdac3* KO on epididymal WAT

**a)** Deletion of *Hdac3* in EpiWAT detected by PCR; **b)** Western blot analysis of HDAC3, showing the deletion of the protein in epididymal WAT of knock out mice versus floxed mice; **c)** Epididymal fat weight of floxed and H3atKO mice (n=11 per group); **d)** Hematoxylin-eosin staining of EpiWAT from floxed and H3atKO mice, scale bar is 100 $\mu$ m; **e,f,g)** Gene expression analysis of adipose markers, oxidative metabolism genes and browning genes in EpiWAT of floxed and H3atKO mice (n=9-11 per group).

Data are presented as mean  $\pm$  SEM. Statistical analysis: Student's t test, \*p<0.05, \*\*\*p<0.001.

## Supplementary Figure 3

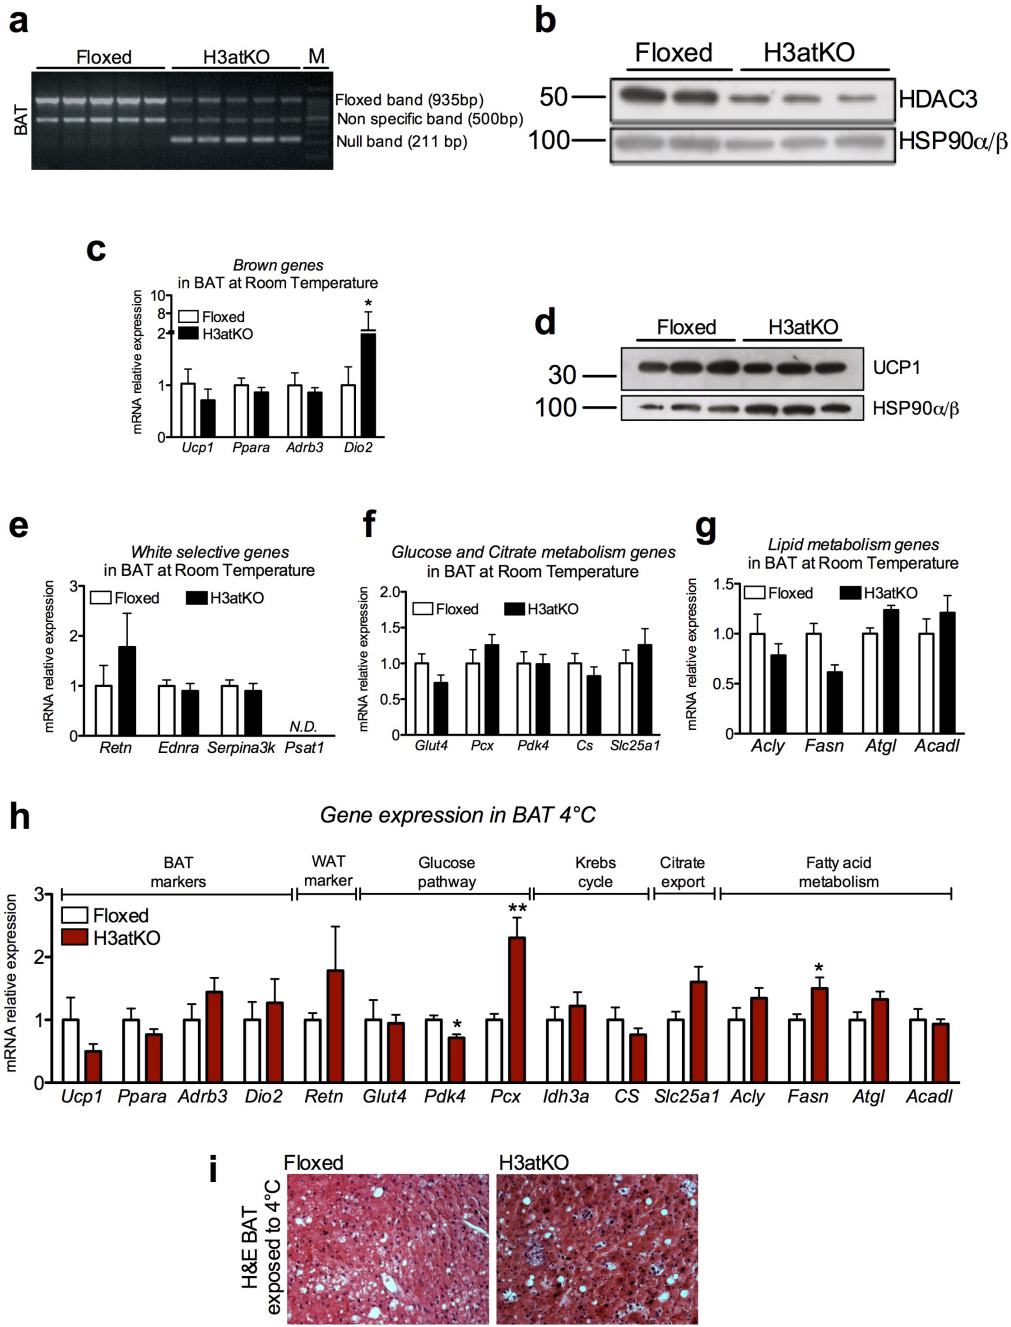

### Supplementary Figure 3. Impact of *Hdac3* KO on BAT

**a)** Deletion of *Hdac3* in BAT detected by PCR; **b)** Western blot analysis of HDAC3, showing the deletion of the protein in BAT of knock out mice versus floxed mice; **c)** Gene expression analysis of brown genes in BAT of floxed and H3atKO mice (n=9-11 per group) housed at room temperature; **d)** Western blot showing UCP1 expression in BAT of floxed and H3atKO mice housed at room temperature; **e, f, g)** Gene expression analysis of white selective genes, glucose and citrate metabolism and lipid metabolism markers in BAT of floxed and H3atKO mice (n=9-11 per group) housed at room temperature; **h)** Gene expression analysis in BAT of floxed and H3atKO mice (n=6 per group) housed at 4°C for 24 hours; **i)** Hematoxylin-eosin staining of BAT from floxed and H3atKO mice housed at 4°C for 24 hours, scale bar is 100 $\mu$ m.

Data are presented as mean  $\pm$  SEM. Statistical analysis: Student's t test, \*p<0.05, \*\*p<0.01.

## Supplementary Figure 4

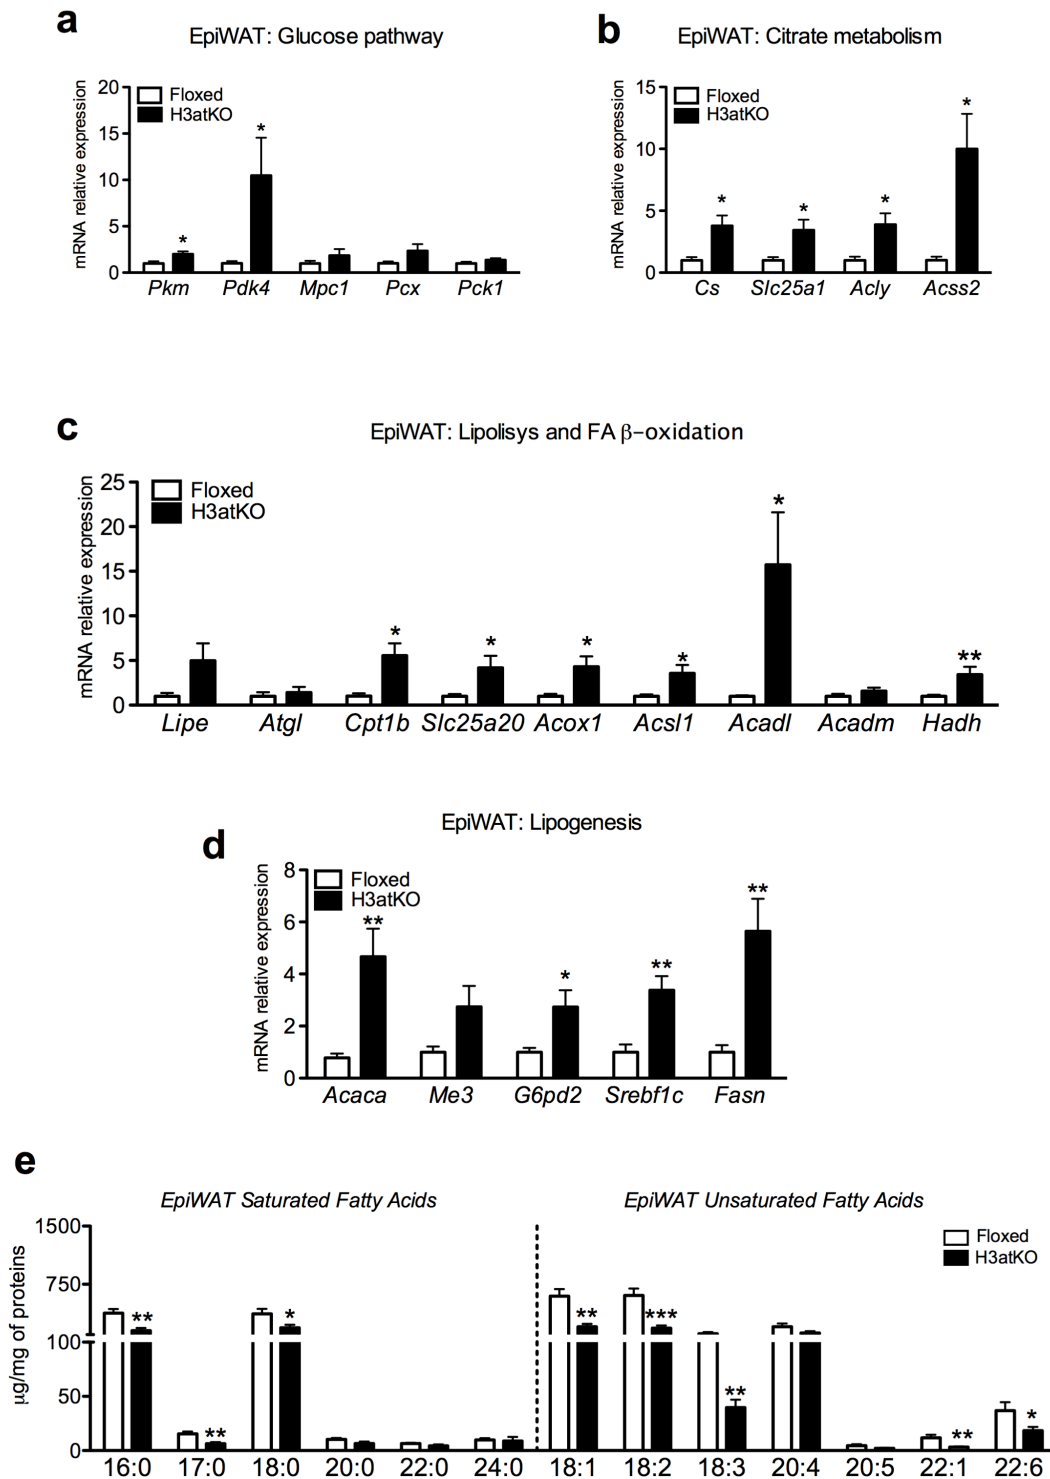

Supplementary Figure 4. Gene expression and fatty acid profile in epididymal WAT

**a, b, c, d)** Gene expression analysis of genes involved in glucose and citrate metabolism, lipolysis and FA  $\beta$ -oxidation, and lipogenesis in EpiWAT of floxed and H3atKO mice (n=9-11 per group); **e)** EpiWAT fatty acid quantification by mass spectrometry in floxed and H3atKO mice (n=8 per group).

Data are presented as mean  $\pm$  SEM. Statistical analysis: Student's t test, \*p<0.05, \*\*p<0.01, \*\*\*p<0.001.

## Supplementary Figure 5

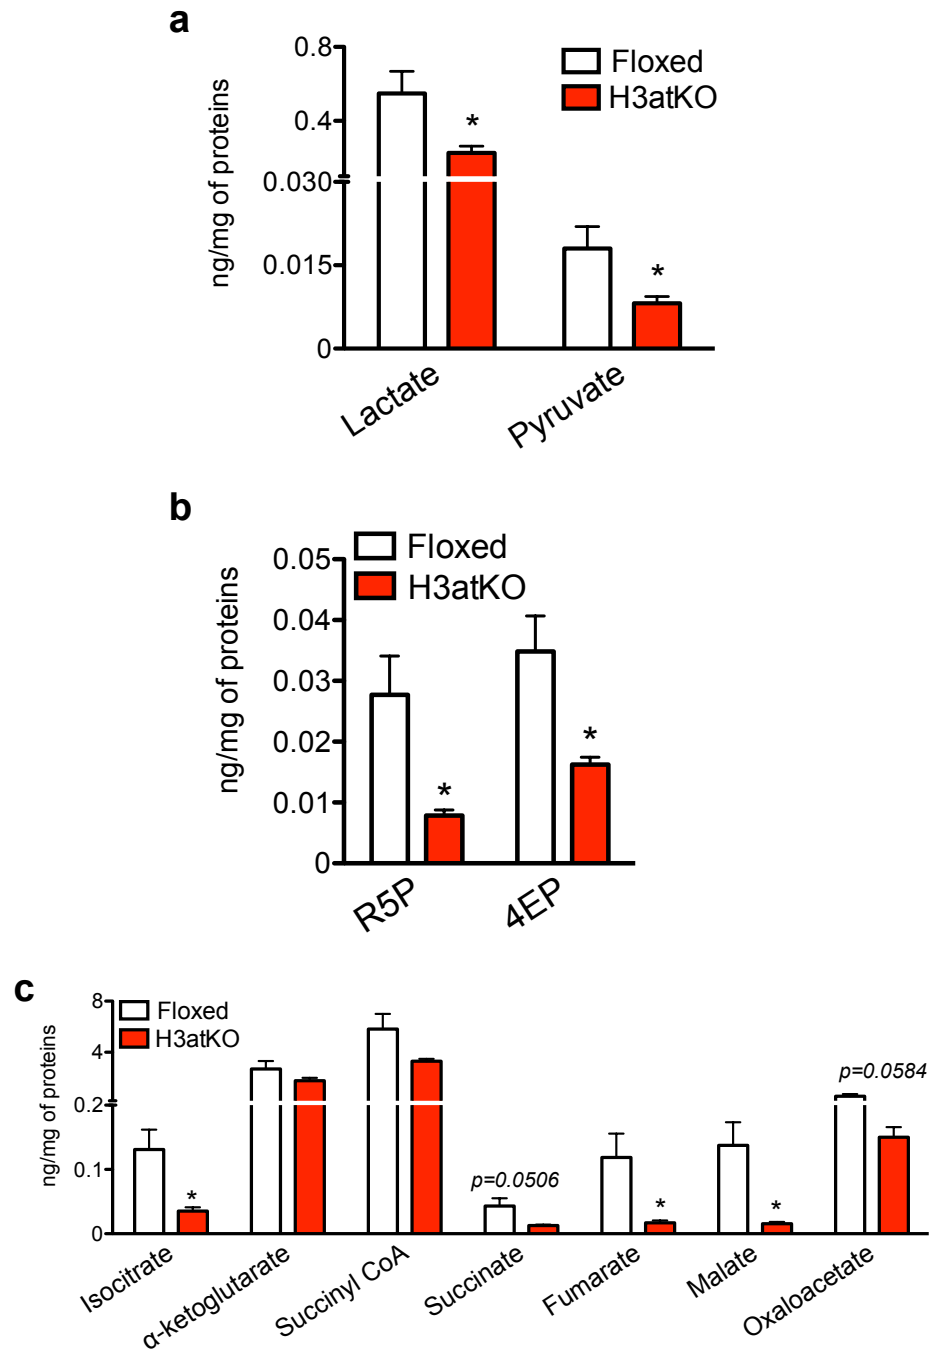

Supplementary Figure 5. Glucose and TCA cycle metabolites in inguinal WAT

**a,b,c)** Levels of lactate and pyruvate, pentose phosphate and TCA cycle intermediates in IngWAT of floxed and H3atKO mice (n=7-8 per group).

Data are presented as mean ± SEM. Statistical analysis: Student's t test, \*p<0.05.

# Supplementary Figure 6

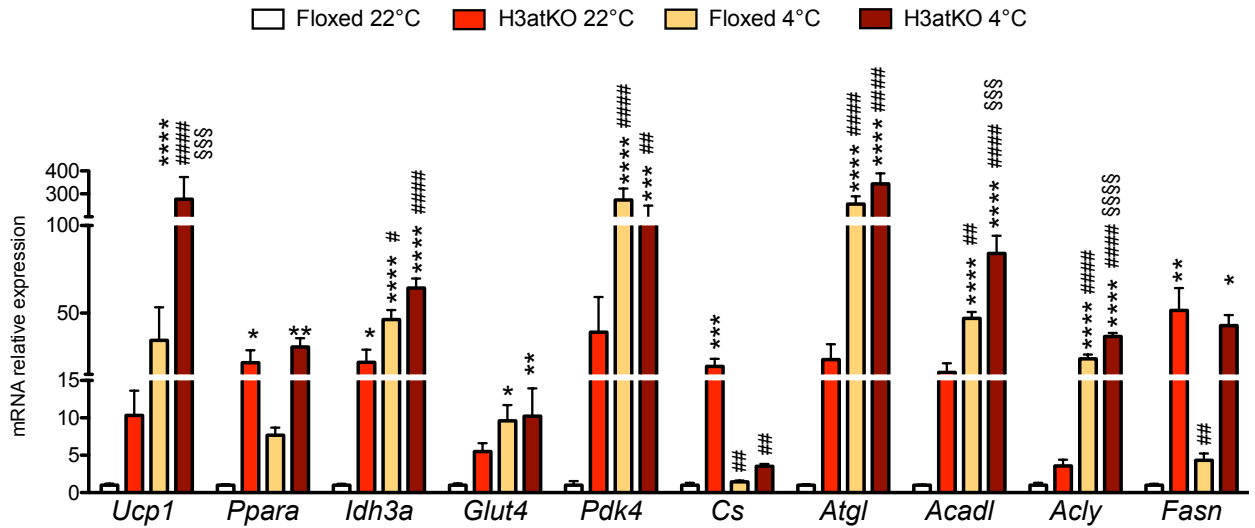

Supplementary Figure 6. Effect of temperature on gene expression in inguinal WAT  
 Gene expression analysis of IngWAT from floxed and H3atKO mice exposed to room temperature (22°C) or to 4°C for 24 hours. Data are presented as mean ± SEM. Statistical analysis: Two way ANOVA, Tukey as post hoc test, \*p<0.05, \*\*p<0.01, \*\*\*p<0.001, \*\*\*\*p<0.0001 vs Floxed 22°C, #p<0.05, ##p<0.01, ###p<0.001, ####p<0.0001 vs H3atKO 22°C, §§§p<0.001, §§§§p<0.0001 vs Floxed 4°C.

## Supplementary Figure 7

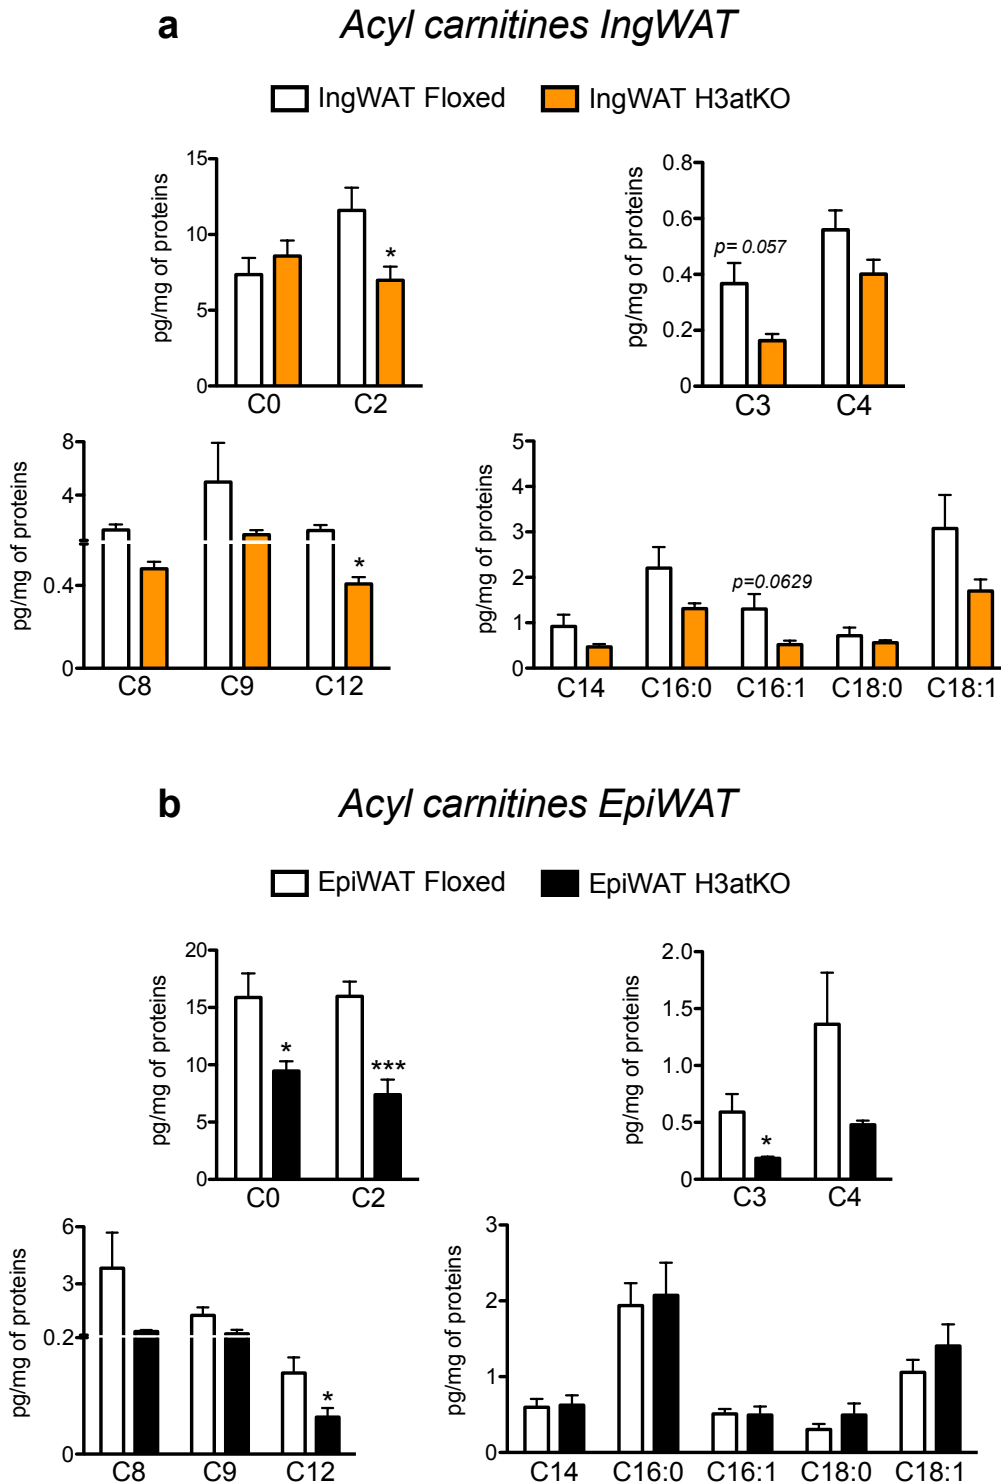

Supplementary Figure 7. Acyl carnitines in inguinal and epididymal WAT

**a, b)** Acylcarnitines levels in inguinal and epididymal WAT of *Hdac3* floxed and knock out mice (n=7-8 per group).

Data are presented as mean  $\pm$  SEM. Statistical analysis: Student's t test, \* $p < 0.05$ , \*\*\* $p < 0.001$ .



## Supplementary Figure 8

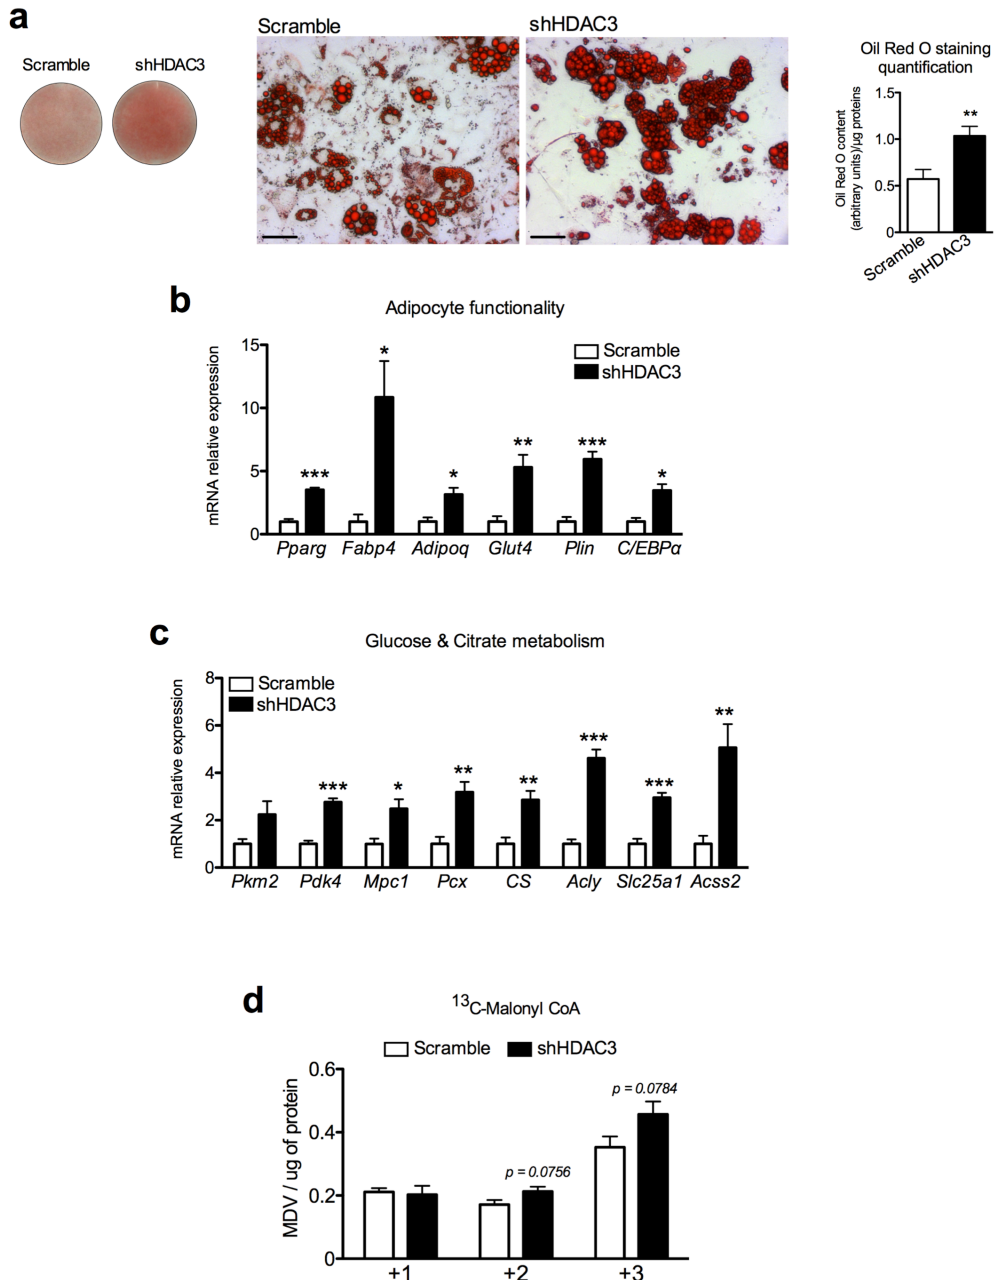

Supplementary Figure 8. HDAC3 silencing in cell culture recapitulates *in vivo* *Hdac3* KO

**a)** Oil Red O staining and quantification in C3H/10T1/2 cells infected with adenovirus expressing a shRNA targeted to *Hdac3* (shHDAC3) versus cell infected with a scrambled control shRNA (scramble) (n=10 per group), scale bar is 100 $\mu$ m; **b, c)** Gene expression analysis of genes involved in adipocyte functionality and in glucose and citrate metabolism in scramble and *Hdac3* knock down cells (n=4 biological replicates per group); **d)**  $^{13}$ C-labeled acetyl-CoA scramble and *Hdac3* knock down cells (n=6 per group).

Data are presented as mean  $\pm$  SEM. Statistical analysis: Student's t test, \* $p < 0.05$ , \*\* $p < 0.01$ , \*\*\* $p < 0.001$ .

## Supplementary Figure 9

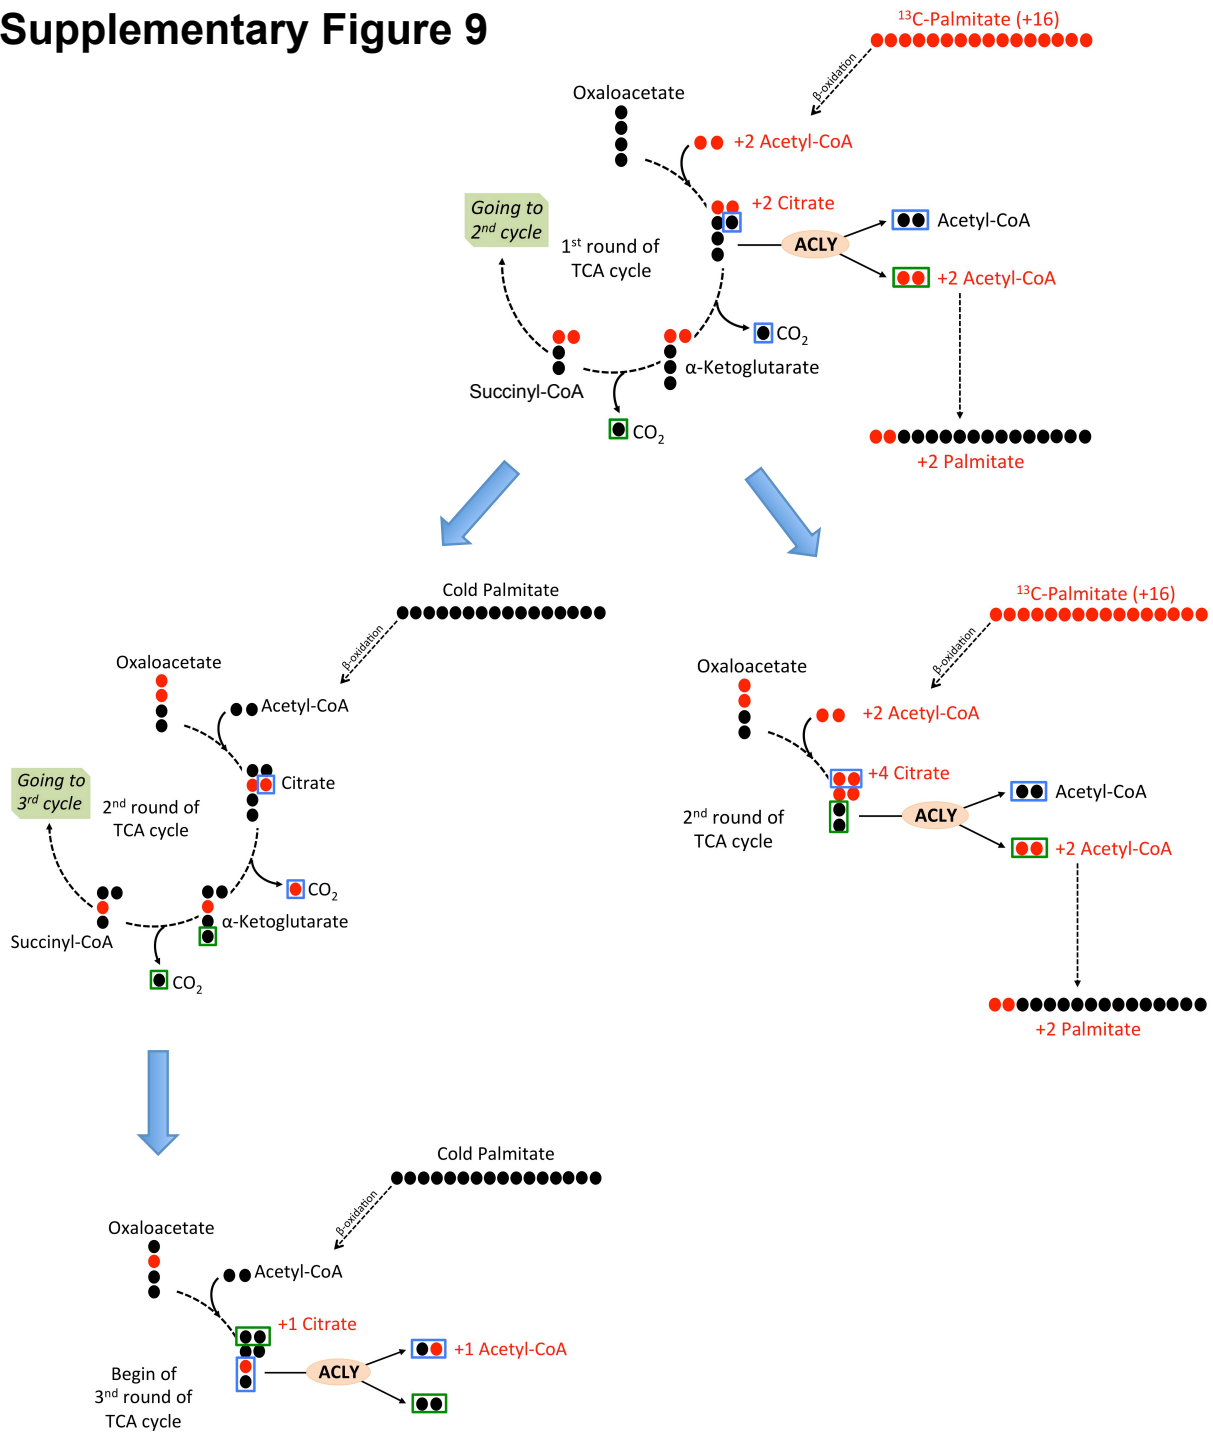

Supplementary Figure 9. Schematic representation of  $^{13}\text{C}$ -palmitate incorporation into TCA cycle.

The first molecule of  $^{13}\text{C}$ -palmitate undergoes  $\beta$ -oxidation and  $^{13}\text{C}$ -labeled acetyl-CoA enters the cycle, and, condensing with oxaloacetate produces (+2)  $^{13}\text{C}$  citrate. This citrate is in part used as substrate by ACLY enzyme, producing cold acetyl-CoA or (+2)  $^{13}\text{C}$  Acetyl-CoA. (+2)  $^{13}\text{C}$  citrate can also proceed into Krebs cycle, forming at the end of the first round (+2)  $^{13}\text{C}$  oxaloacetate. If a molecule of cold acetyl-CoA (originating from endogenous cold palmitate) enters the cycle, at the end of the second round a (+1)  $^{13}\text{C}$  oxaloacetate will be available. This, by condensate with another molecule of cold acetyl-CoA, will provide (+1)  $^{13}\text{C}$  citrate, which serves as substrate for ACLY to produce (+1)  $^{13}\text{C}$  acetyl-CoA. Alternatively, if after the first round of Krebs cycle, a molecule of (+2)  $^{13}\text{C}$  acetyl-CoA condensate with (+2)  $^{13}\text{C}$  oxaloacetate, (+4)  $^{13}\text{C}$  citrate will be available, and ACLY enzyme will produce both cold acetyl-CoA and (+2)  $^{13}\text{C}$  acetyl-CoA, which could be incorporated into newly synthesized fatty acids (e.g. (+2)  $^{13}\text{C}$  palmitate).

## Supplementary Figure 10

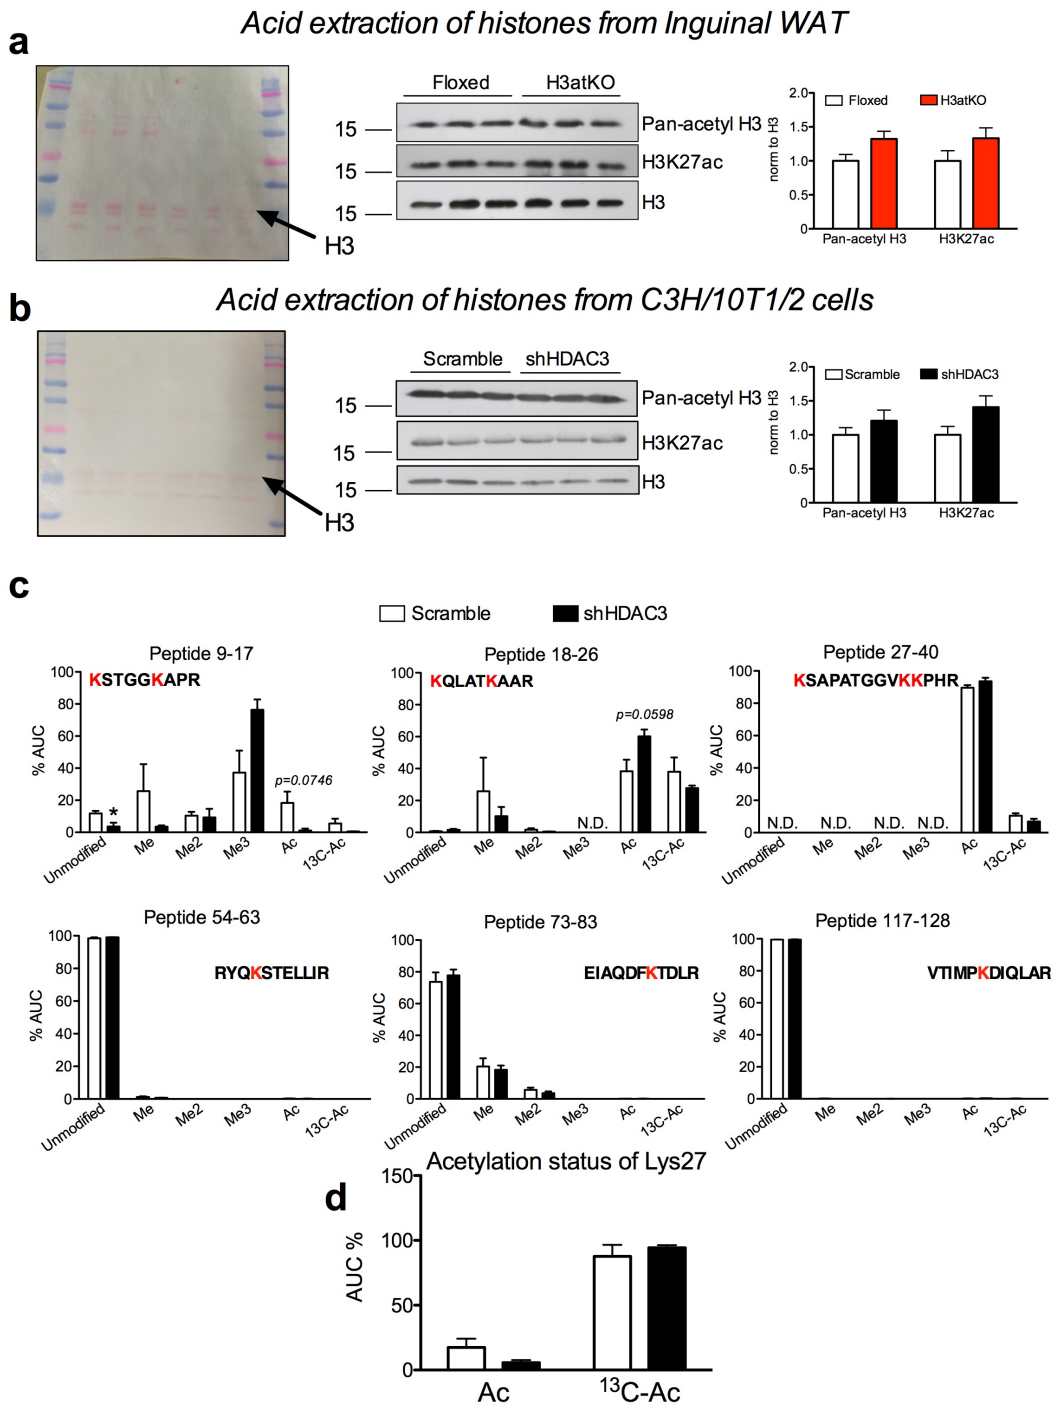

Supplementary Figure 10. Analysis of histone acetylation by western blot and mass spectrometry

**a)** Acid extraction of histones from Inguinal WAT: Ponceau S staining revealing the presence of histones, Western blot and quantification of and pan-acetyl H3 and H3K27ac in IngWAT from floxed and H3atKO mice; **b)** Acid extraction of histones from C3H10T1/2 cells: Ponceau S staining revealing the presence of histones, Western blot and quantification of and pan-acetyl H3 and H3K27ac in scramble and *Hdac3* knock down cells; **c)** Mass spectrometry analysis of histone H3 methylation/acetylation status in cells infected with scramble or HDAC3 shRNAs and incubated with [<sup>13</sup>C]-palmitate; **d)** Mass spectrometry analysis of histone H3(27-40) acetylation status of Lysine 27 in cells infected with scramble or HDAC3 shRNAs and incubated with [<sup>13</sup>C]-palmitate.

Data are presented as mean ± SEM. Statistical analysis: Student's t test, \*p<0.05.

## Supplementary Figure 11

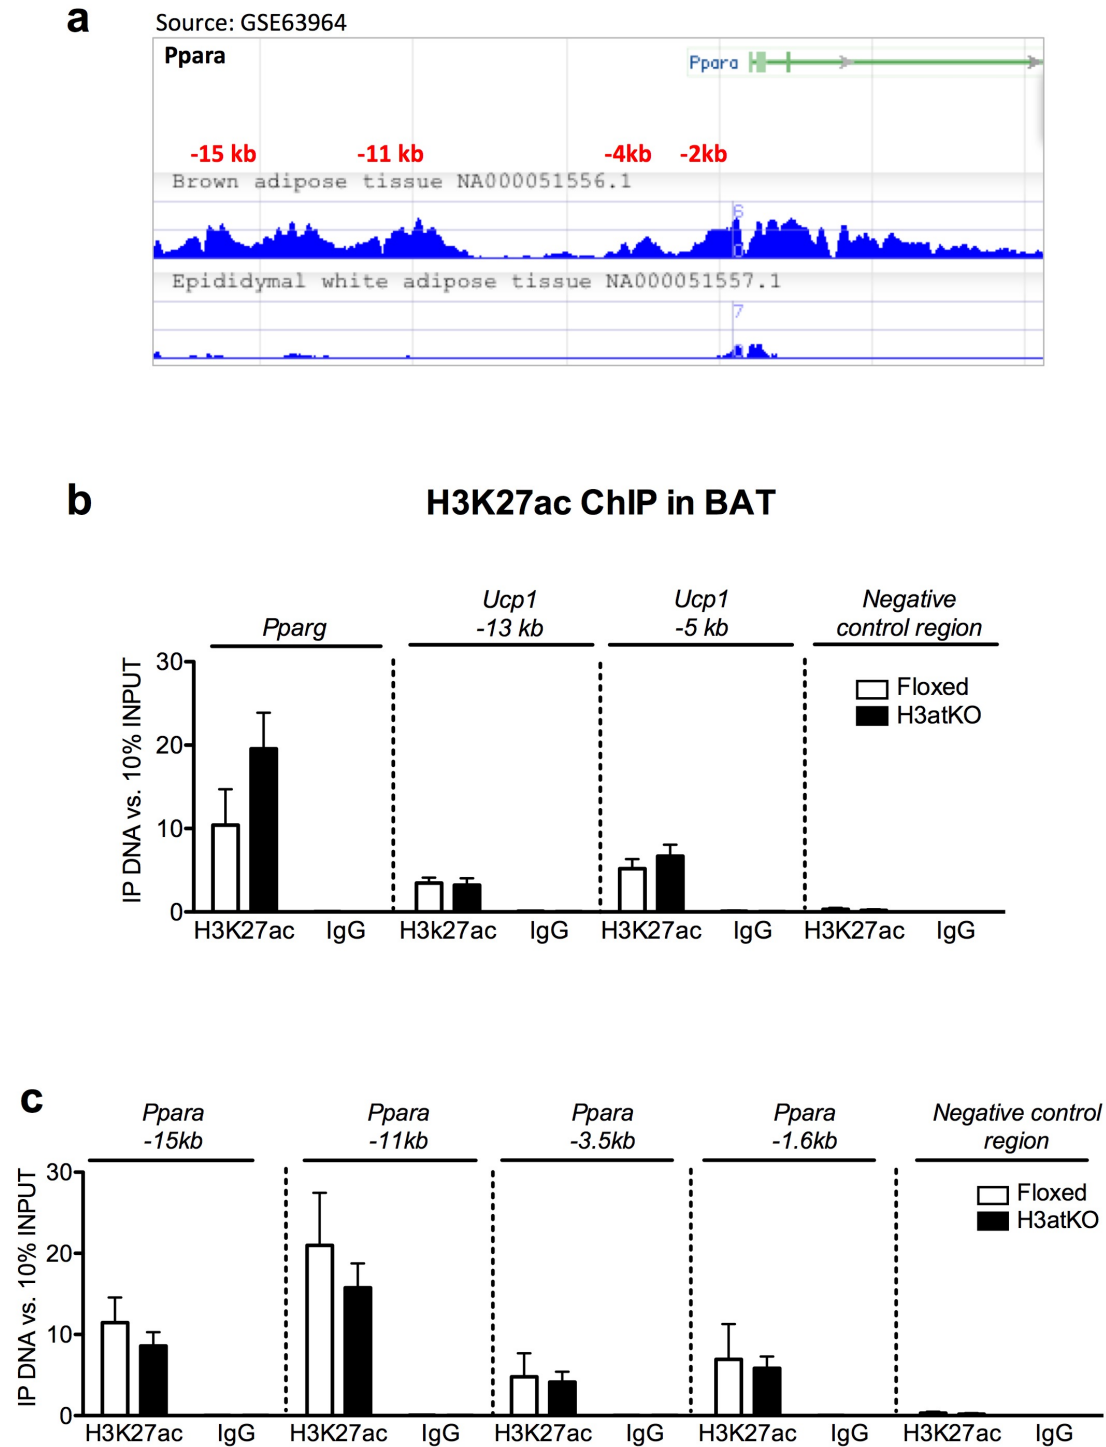

Supplementary Figure 11. Analysis of enhancer acetylation in BAT

**a)** H3K27ac ChIP-seq profile in BAT versus EpiWAT on upstream *Ppara* TSS (Source: GSE63964); **b), c)** H3K27ac ChIP analysis in BAT of floxed and H3atKO mice (n=3 per group, where each sample represent a pool from 2 individual mice).

Data are presented as mean  $\pm$  SEM. Statistical analysis: Student's t test.

## Supplementary Figure 12

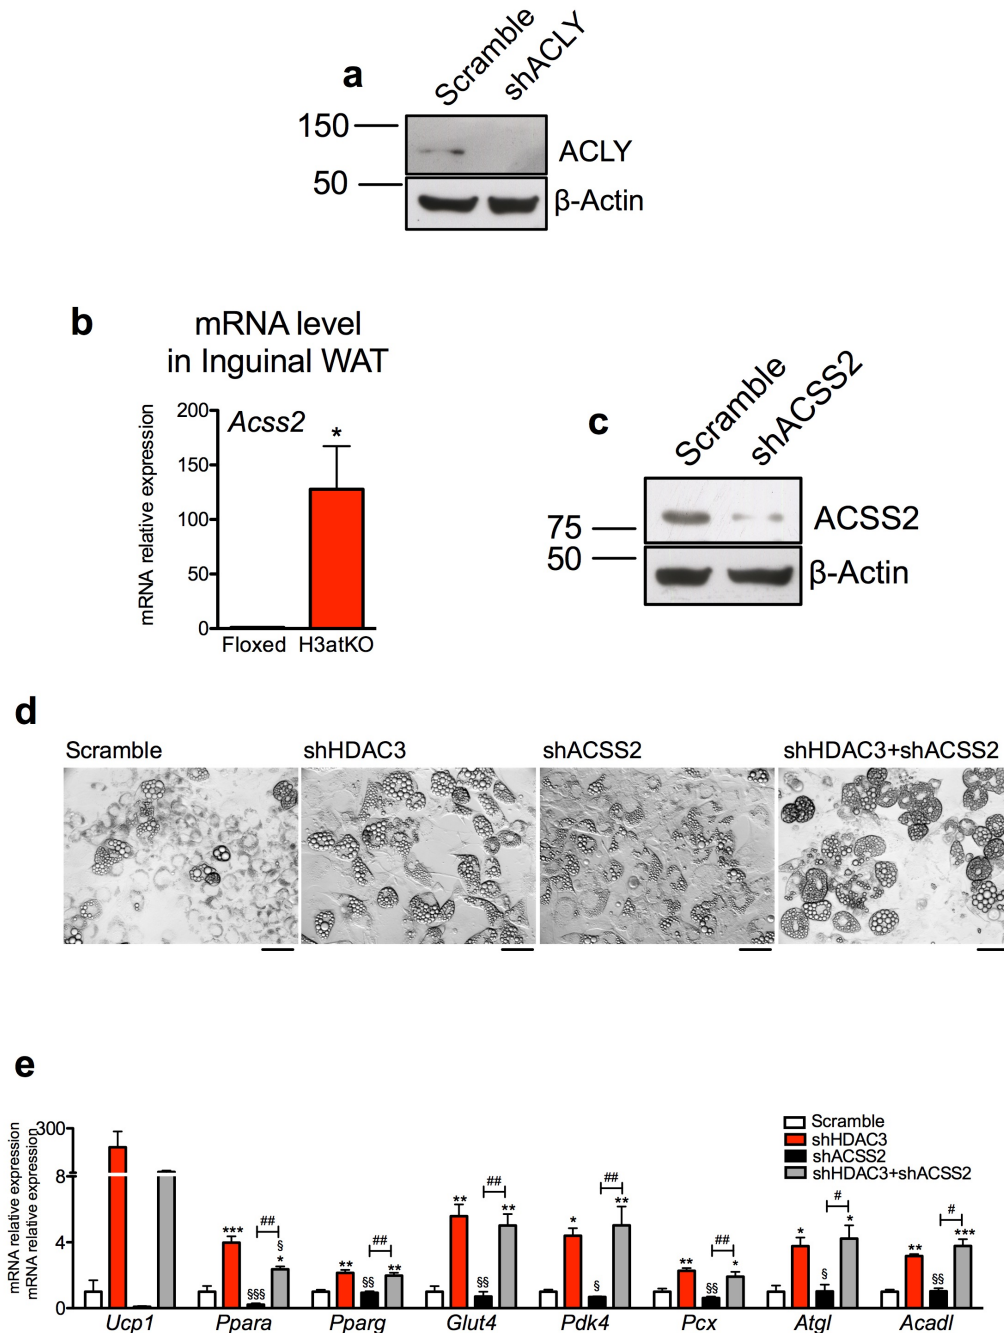

Supplementary Figure 12. *Acss2* does not affect the phenotype of HDAC3 knocked down adipocytes

**a**) Efficiency of *Acly* silencing in cells infected with adenovirus expressing shRNA targeted to *Acly* (shACLY); **b**) Expression of *Acss2* gene in IngWAT of floxed and H3atKO mice (n=9-11 per group). Data are presented as mean  $\pm$  SEM. Statistical analysis: Student's t test, \* $p$ <0.05, \*\* $p$ <0.01, \*\*\* $p$ <0.001. **c**) Efficiency of *Acss2* silencing in cells infected with adenovirus expressing shRNA targeted to *Acss2* (shACSS2); **d**) Morphology of cells infected with adenovirus expressing shRNA targeted to *Hdac3* (shHDAC3), to *Acss2* (shACSS2), or both (shHDAC3+shACSS2) or to a scrambled control shRNA (scramble), scale bar is 50 $\mu$ m; **e**) Gene expression analysis in knocked down cells (n=3 per group). Data are presented as mean  $\pm$  SEM. Statistical analysis: 1 way ANOVA, Tukey as post hoc test, \* $p$ <0.05, \*\* $p$ <0.01, \*\*\* $p$ <0.001 vs scramble, \$ $p$ <0.05, \$\$ $p$ <0.01, \$\$\$ $p$ <0.001 vs shHDAC3, # $p$ <0.05, ## $p$ <0.01, ### $p$ <0.001 vs shACSS2.

## Supplementary Figure 13

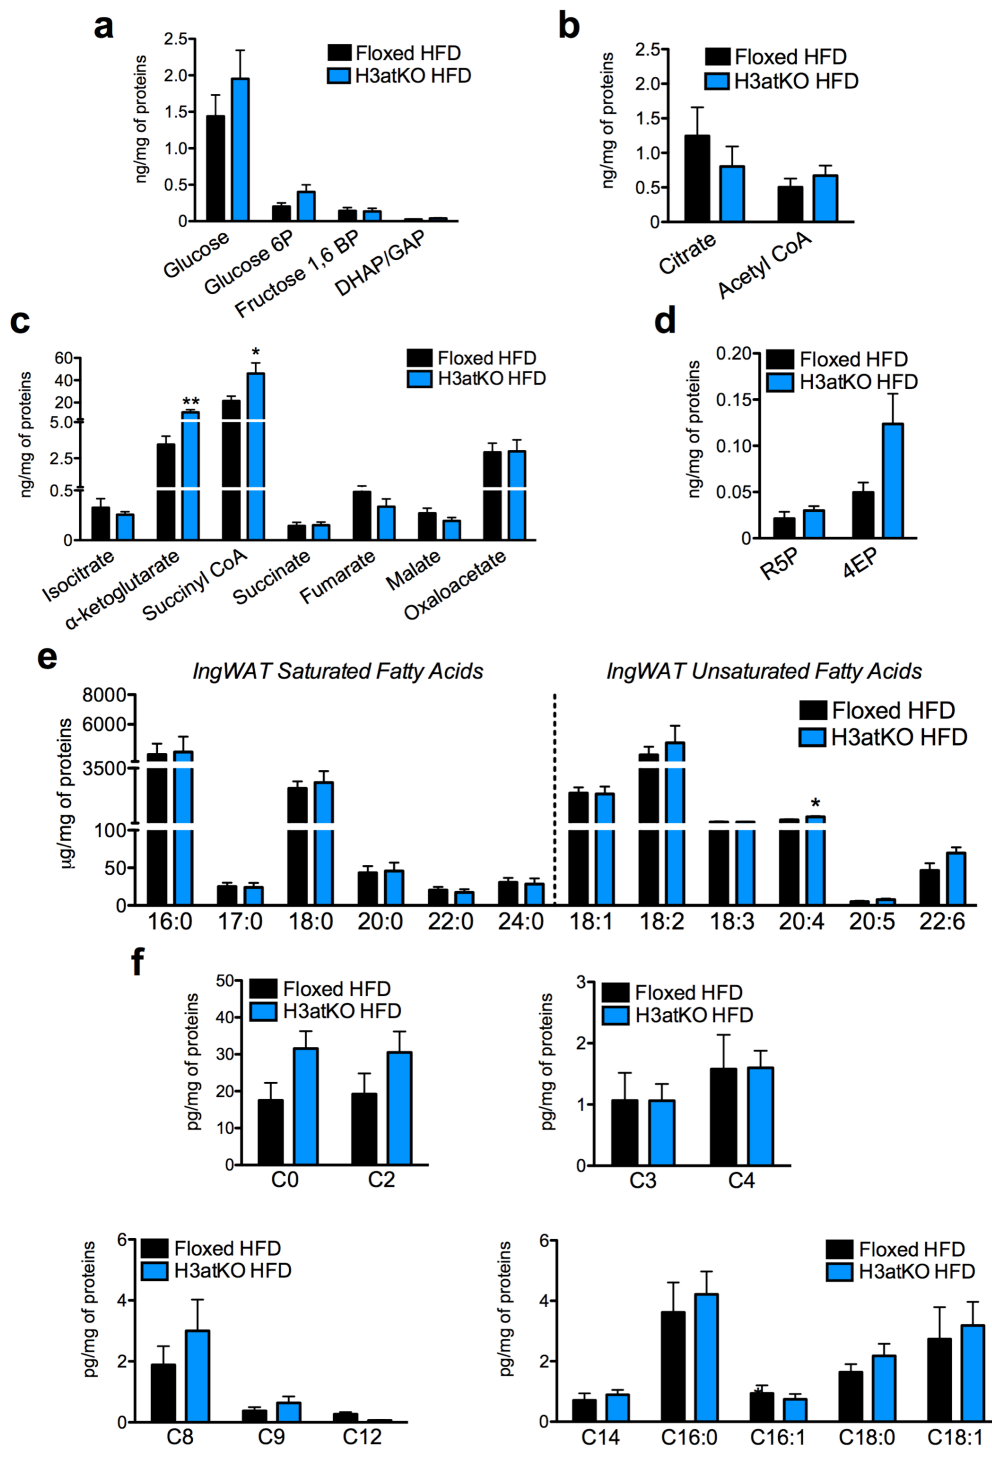

Supplementary Figure 13. High fat diet prevents the effects of *Hdac3* deletion

**a, b, c, d)** Levels of glycolytic intermediates, citrate, acetyl-CoA, TCA cycle and pentose phosphate intermediates in IngWAT from floxed and H3atKO mice fed HFD (n=6 per group); **e)** IngWAT fatty acid quantification by mass spectrometry in floxed and H3atKO mice (n=6 per group); **f)** Acylcarnitines levels in inguinal WAT of *Hdac3* floxed and knock out mice fed HFD (n=6 per group).

Data are presented as mean  $\pm$  SEM. Statistical analysis: Student's t test, \*p<0.05, \*\*p<0.01.

## Supplementary Figure 14

### Inguinal WAT HFD

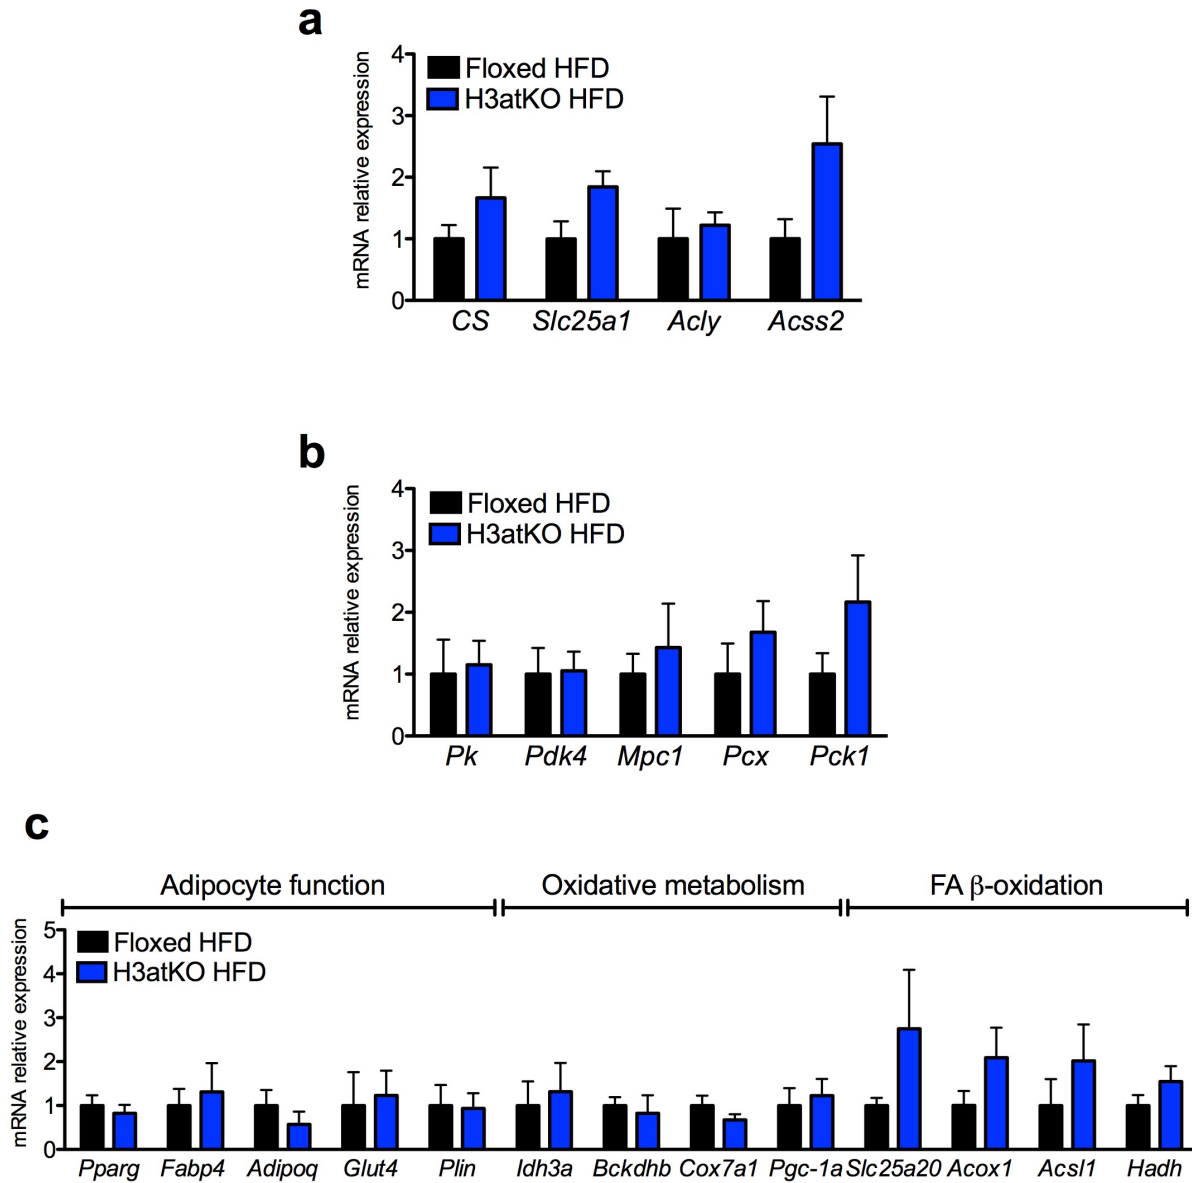

Supplementary Figure 14. Effect of *Hdac3* KO on gene expression in IngWAT of HFD fed mice.

**a)** Expression of genes related to citrate metabolism in IngWAT of floxed and H3atKO mice fed HFD (n=5 per group); **b)** Expression of genes related to glucose metabolism in IngWAT of floxed and H3atKO mice fed HFD (n=5 per group); **c)** Expression of genes involved in adipocyte functionality, oxidative metabolism and FA  $\beta$ -oxidation in IngWAT of floxed and H3atKO mice fed HFD (n=5 per group). Data are presented as mean  $\pm$  SEM. Statistical analysis: Student's t test.

## Supplementary Figure 15

### Acid extraction of histones from Inguinal WAT HFD

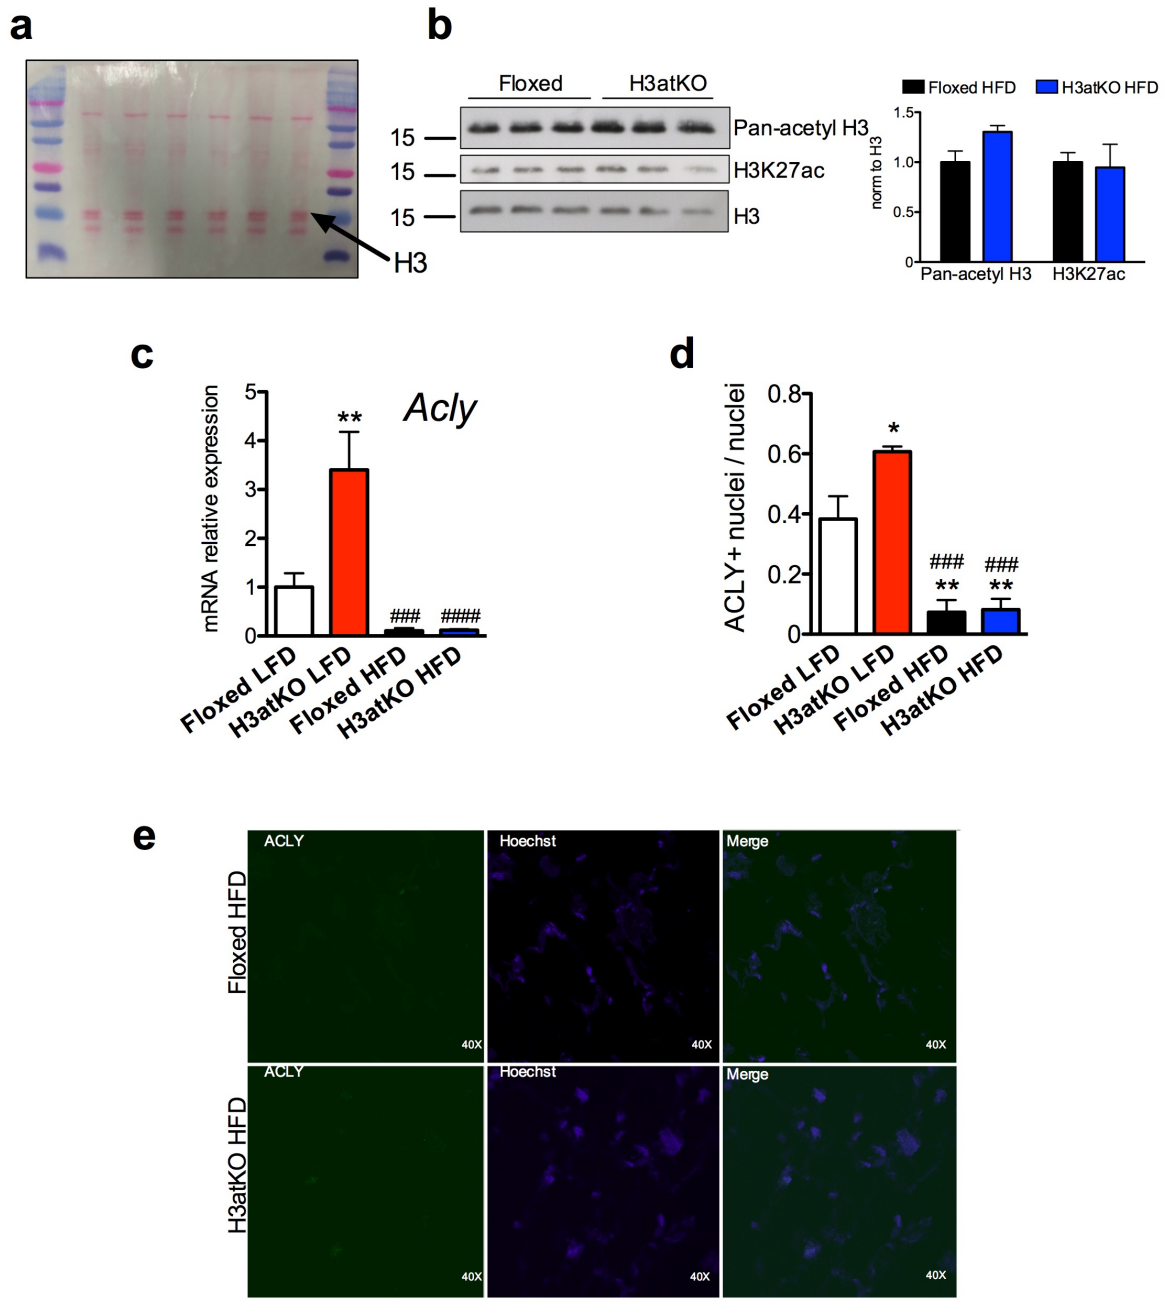

Supplementary Figure 15. Histone acetylation, *Acly* expression and localization in HFD mice

**a, b**) Acid extraction of histones from Inguinal WAT: Ponceau S staining revealing the presence of histones, Western blot and quantification of pan-acetyl H3 and H3K27ac in IngWAT from floxed and H3atKO mice fed HFD. Data are presented as mean  $\pm$  SEM. Statistical analysis: Student's t test, \* $p$ <0.05, \*\* $p$ <0.01, \*\*\* $p$ <0.001; **c**) Expression of *Acly* gene in IngWAT of floxed and H3atKO mice fed LFD ( $n$ =9-11 per group) or fed HFD ( $n$ =12 per group); **d, e**) Immunofluorescence staining and quantification of ACLY, showing nuclear localization in *Hdac3* knock out mice fed LFD or HFD ( $n$ =3 per group), scale bar is 40  $\mu$ m. Quantification of ACLY+ nuclei in samples from mice fed LFD was previously reported also in Fig 7b. Data are presented as mean  $\pm$  SEM. Statistical analysis: Two way ANOVA, Tukey as post hoc test, \* $p$ <0.05, \*\* $p$ <0.01, vs Floxed LFD, ### $p$ <0.001, #### $p$ <0.0001 vs H3atKO LFD.



## Supplementary Figure 16

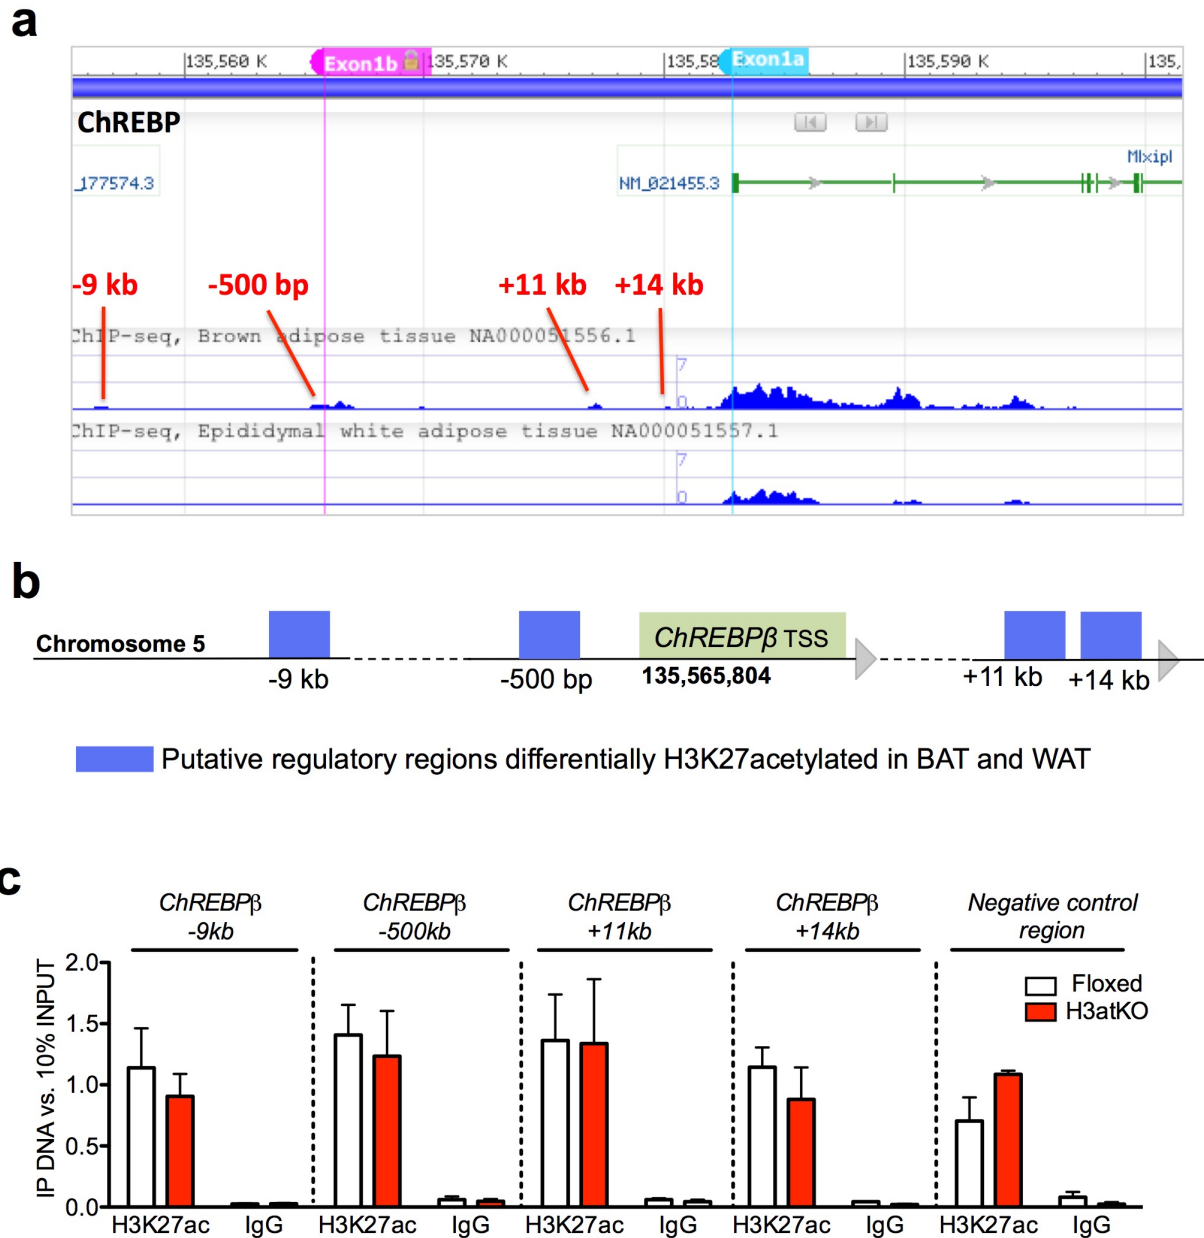

Supplementary Figure 16. Analysis of H3K27ac histone marks on *ChREBP $\beta$*  regulatory regions.

**a, b**) H3K27ac ChIP-seq profile in BAT versus EpiWAT on upstream *ChREBP $\beta$*  TSS (Source: GSE63964); **c**) H3K27ac ChIP analysis on regions upstream and downstream of *ChREBP $\beta$*  TSS in IngWAT from floxed and H3atKO mice fed LFD (n=3 per group, where each sample represent a pool from 2 individual mice).

Data are presented as mean  $\pm$  SEM. Statistical analysis: Student's t test.

# Supplementary Figure 17

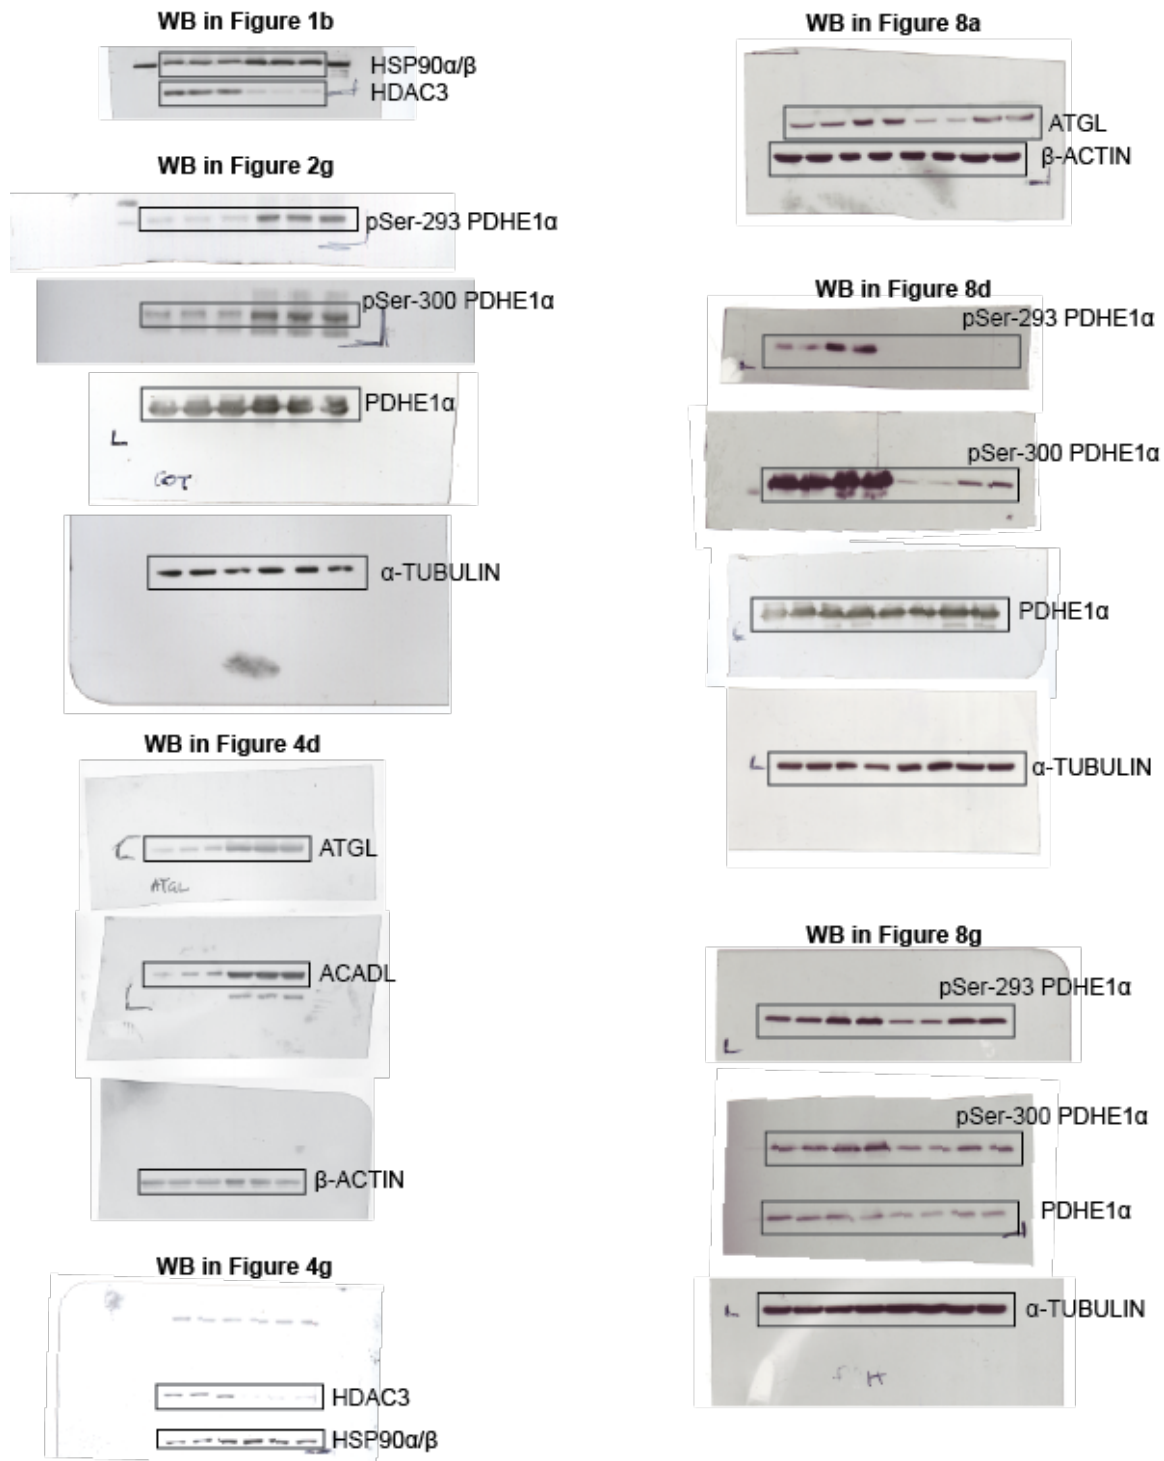

Supplementary Figure 17. Original films (uncropped scans) of western blot included in the main figures.

## Supplementary Table 1

Volcano Plot of LFD mice

### Volcano Plot LFD

|                           | Log2 fold change | -Log10 p-value |
|---------------------------|------------------|----------------|
| Glucose                   | -1.563           | 1.415          |
| G6P                       | -1.263           | 1.696          |
| F1,6BP                    | -1.763           | 0.797          |
| GAP                       | -1.886           | 1.627          |
| Lactate                   | -1.278           | 1.433          |
| Piruvate                  | -1.137           | 1.326          |
| R5P                       | -1.815           | 1.685          |
| E4P                       | -1.101           | 1.743          |
| Acetyl-CoA                | -1.146           | 1.424          |
| Citrate                   | -3.356           | 3.358          |
| Isocitrate                | -1.899           | 1.686          |
| 2-Oxoglutarate            | -0.6             | 0.675          |
| Succinyl-CoA              | -0.814           | 1.099          |
| Succinate                 | -1.74            | 1.303          |
| Fumarate                  | -2.815           | 1.475          |
| Malate                    | -3.15            | 1.844          |
| Oxoalacetate              | -1.899           | 1.238          |
| Malonyl-CoA               | -1.312           | 1.584          |
| NADH                      | -0.942           | 0.745          |
| NADPH                     | -0.741           | 0.98           |
| ATP                       | -0.093           | 0.092          |
| ADP                       | -1.364           | 0.437          |
| AMP                       | -1.154           | 0.513          |
| Carnitine                 | 0.223            | 0.365          |
| Acetyl-L-carnitine        | -0.732           | 1.616          |
| Propionyl-L-carnitine     | -0.878           | 0.939          |
| Butyryl-L-carnitine       | -0.483           | 1.075          |
| Valeryl-L-carnitine       | -0.358           | 0.547          |
| Hexanoyl-L-carnitine      | -1.991           | 0.898          |
| Octanoyl-L-carnitine      | -1.525           | 1.128          |
| Nonayl-L-carnitine        | -2.271           | 0.637          |
| Decanoyl-L-carnitine      | -1.723           | 1.182          |
| Dodecanoyl-L-carnitine    | -1.963           | 1.317          |
| Tetradecanoyl-L-carnitine | -0.967           | 0.87           |
| Palmitoyl-L-carnitine     | -0.749           | 0.98           |
| Hexadecenoyl-L-carnitine  | -1.321           | 1.239          |
| Stearoyl-L-carnitine      | -0.346           | 0.349          |
| Octadecenoyl-L-carnitine  | -0.856           | 0.922          |
| Palmitic acid             | -1.16            | 1.678          |
| Stearic acid              | -1.153           | 1.774          |
| Oleic acid                | -1.446           | 1.835          |

|                      |        |       |
|----------------------|--------|-------|
| Linoleic acid        | -1.259 | 1.652 |
| gamma-linolenic acid | -1.773 | 1.429 |
| Arachidonic acid     | -1.081 | 0.96  |
| Docosahexaenoic acid | -1.421 | 1.246 |
| Arachidic acid       | -1.252 | 1.8   |
| Behenic acid         | -1.781 | 1.909 |
| Erucic acid          | -1.656 | 1.562 |
| Lignoceric acid      | -1.721 | 1.836 |
| Margaric acid        | -1.432 | 1.865 |

## Supplementary Table 2

Volcano Plot of HFD mice

### Volcano Plot HFD

|                        | Log2 fold change | -Log10 p-value |
|------------------------|------------------|----------------|
| Glucose                | 0.245            | 0.499          |
| G6P                    | 0.738            | 1.018          |
| F1,6BP                 | -0.296           | 0.041          |
| GAP                    | 0.389            | 0.739          |
| Lactate                | 0.209            | 0.392          |
| Piruvate               | 0.019            | 0.086          |
| R5P                    | 0.229            | 0.46           |
| E4P                    | 1.054            | 1.124          |
| Acetyl-CoA             | 0.241            | 0.389          |
| Citrate                | -0.603           | 0.396          |
| Isocitrate             | -0.349           | 0.317          |
| 2-Oxoglutarate         | 1.442            | 1.704          |
| Succinyl-CoA           | 0.876            | 1.421          |
| Succinate              | -0.094           | 0.047          |
| Fumarate               | -0.55            | 0.557          |
| Malate                 | -0.439           | 0.634          |
| Oxoalacetate           | -0.128           | 0.026          |
| Malonyl-CoA            | 0.09             | 0.183          |
| NADH                   | 0.977            | 1.829          |
| NADPH                  | 0.455            | 0.72           |
| ATP                    | 0.321            | 0.442          |
| ADP                    | 0.912            | 1.136          |
| AMP                    | 0.614            | 0.93           |
| Carnitine              | 0.59             | 1.205          |
| Acetyl-L-carnitine     | 0.499            | 0.73           |
| Propionyl-L-carnitine  | -0.216           | 0.018          |
| Butyryl-L-carnitine    | -0.183           | 0.032          |
| Octanoyl-L-carnitine   | 0.468            | 0.426          |
| Nonayl-L-carnitine     | 0.506            | 0.524          |
| Dodecanoyl-L-carnitine | -0.162           | 0.004          |

|                           |        |       |
|---------------------------|--------|-------|
| Tetradecanoyl-L-carnitine | 0.296  | 0.356 |
| Palmitoyl-L-carnitine     | -0.18  | 0.18  |
| Hexadecenoyl-L-carnitine  | 0.175  | 0.239 |
| Stearoyl-L-carnitine      | 0.349  | 0.132 |
| Octadecenoyl-L-carnitine  | 0.319  | 0.547 |
| Palmitic acid             | 0.222  | 0.305 |
| Stearic acid              | 0.054  | 0.175 |
| Oleic acid                | -0.164 | 0.029 |
| Linoleic acid             | 0.115  | 0.267 |
| gamma-linolenic acid      | -0.179 | 0.043 |
| Arachidonic acid          | 0.5    | 1.797 |
| Docosahexaenoic acid      | 0.415  | 1.076 |
| Arachidic acid            | -0.053 | 0.062 |
| Behenic acid              | -0.316 | 0.216 |
| Lignoceric acid           | -0.244 | 0.081 |
| Margaric acid             | -0.191 | 0.056 |

### Supplementary Table 3

#### PRIMERS for GENE EXPRESSION

| Gene          | Sequences                                                                                                |
|---------------|----------------------------------------------------------------------------------------------------------|
| <i>Pparg</i>  | ABI MIX Mm01184322_m1                                                                                    |
| <i>Adrb3</i>  | ABI MIX Mm02601819_g1                                                                                    |
| <i>Prdm16</i> | ABI MIX Mm00712556_m1                                                                                    |
| <i>36b4</i>   | Forward AGATGCAGCAGATCCGCAT<br>Reverse GTTCTTGCCCATCAGCACC<br>Probe CGCTCCGAGGGAAGGCCG                   |
| <i>Ucp1</i>   | Forward GAGCTGGTAACATATGACCTC<br>Reverse GAGCTGACAGTAAATGGCA<br>Probe ACAAATACTGGCAGATGACGTCCC           |
| <i>Dio2</i>   | Forward CTGTGTCTGGAACAGCTT<br>Reverse CACTGGAATTGGGAGCAT<br>Probe CTAGATGCCTACAAACAGGTTAAACTGGGT         |
| <i>Ppara</i>  | Forward ACGCATGTGAAGGCTGTAAG<br>Reverse CACTTGTGAAAACGGCAGTAC<br>Probe CGGCTGAAGCTGGTGTACGACAA           |
| <i>Glut4</i>  | Forward TGTCGCTGGTTTCTCCAACCTG<br>Reverse CCATACGATCCGCAACATACTG<br>Probe ACCTGTAACCTCATTGTCTGGCATGGGTTT |
| <i>Pkm2</i>   | Forward CCATTCTCTACCGTCCTGTTG<br>Reverse TCCATGTAAGCGTTGTCCAG<br>Probe TCAGGTCCCTTTGTATCCAGAGCCA         |
| <i>Pdk4</i>   | Forward AGTGACTCAAAGACGGGAAAC<br>Reverse GTGTGAGGTTTAATTCTGGCG                                           |

|                |                                                                                                        |
|----------------|--------------------------------------------------------------------------------------------------------|
|                | Probe ATCGACCCAAACTGTGATGTGGTAGC                                                                       |
| <i>Pcx</i>     | Forward GAGCTTATCCCGAACATCCC<br>Reverse TCCATACCATTCTCTTTGGCC<br>Probe CACGTTGTCAGGGTAGTTGGGTAGC       |
| <i>Mpc1</i>    | Forward GACTTCCGGGACTATCTCATG<br>Reverse GTCAGAGAATAGCAACAGAGGG<br>Probe CAGAGATTATCAGTGGGCGGATGACTTT  |
| <i>CS</i>      | Forward GGGACTTGTGTATGAGACTTCG<br>Reverse AGCCAAAATAAGCCCTCAGG<br>Probe ACTGTAGCCTCGGAAACGGATGC        |
| <i>Slc25a1</i> | Forward CAGAAGCAGTGGTAGTCGTG<br>Reverse TTCCCTTTAGCCCTTGTTC<br>Probe ATGACCAGACTTCCCTCCAACCCC          |
| <i>Acly</i>    | Forward CTGACCTTGCTGAACCCC<br>Reverse CCCGAGTATTCCCCGTAAT<br>Probe TCTTGGAGGTGTCAATGAACTGGCG           |
| <i>Srebflc</i> | Forward ATGGATTGCACATTTGAAGACATGCT<br>Reverse CCTGTGTCCCCTGTCTCAC<br>Probe CTTCCCGGGCCTGTTTGACGCCCCCTA |
| <i>Fasn</i>    | Forward TCGTGATGAACGTGTACCGG<br>Reverse CGGGTGAGGACGTTTACAAAG<br>Probe TGCCTTCCGTCACTTCCAGTTAGAGCA     |
| <i>Acaca</i>   | Forward AAGGCTATGTGAAGGATGTGG<br>Reverse CTGTCTGAAGAGGTTAGGGAAG<br>Probe AGCTGAGGAAGTTGGCTATCCAGTG     |
| <i>Atgl</i>    | Forward TCGTGTTTCAGACGGAGA<br>Reverse CACATAGCGCACCCCT<br>Probe TGCAGACATTGGCCTGGATGAG                 |
| <i>Lipe</i>    | Forward GCTCCCTTTCCCCGA<br>Reverse ATGCAGAGATTCCCACCT<br>Probe CACTGTGACCTGCTTGGTTCAACT                |
| <i>Acadl</i>   | Forward GAAACCAGGAACTACGTGAAG<br>Reverse GCTGTCCACAAAAGCTCT<br>Probe CACACATACAGACGGTGCAGCATA          |
| <i>Acadm</i>   | Forward ACCCAGATCCTAAAGTACCC<br>Reverse CGAAAGCAATTCCTCTGGTG<br>Probe TGGCCCATGTTTAGTTCCCTTTTTTCCAA    |
| <i>Hadh</i>    | Forward TCTTGACTATGTTGGACTGGATAC<br>Reverse AAGGACTGGGCTGAAATAAGG<br>Probe CTTGGACGGGTGGCATGAAATGG     |
| <i>Cpt1b</i>   | Forward GATGCAGTTCAGAGAATCC<br>Reverse CTTGTTCTTGCCAGAGCT<br>Probe TCTGCCCACTCTACCCTTCCTC              |
| <i>Pck1</i>    | Forward TTGAACTGACAGACTCGCCCT<br>Reverse TGCCCATCCGAGTCATGA                                            |

|                 |                                                                                                    |
|-----------------|----------------------------------------------------------------------------------------------------|
|                 | Probe CCGCATGCTGGCCACCACA                                                                          |
| <i>Acs11</i>    | Forward CTGTGGGATAAACTCATCTTCC<br>Reverse CCTTCATAGAACTGGCAGC<br>Probe CCACCCAGGCTCGACTGTATCTT     |
| <i>Acox1</i>    | Forward TCACGTTTACCCCGGC<br>Reverse CAAGTACGACACCATAACCAC<br>Probe CATCAAGAACCTGGCCGTCTGC          |
| <i>Slc25a20</i> | Forward TCTTTGGGTTTGGTCTGGG<br>Reverse ATTTGATCCGTTCTCCAGGG<br>Probe TCTCCAGAGGATGAACTTAGCTACCCAC  |
| <i>Me3</i>      | Forward CCTATCGTCTTTGCCCTGAG<br>Reverse AGTGAATGTCCTGCCATCTTC<br>Probe CCGAGGAATCTTTGCCAGTGGAAGT   |
| <i>Chrebbp</i>  | Forward CTGCAGATCGCGTGGAG<br>Reverse GCAACTTGAGGCCTTTGAAG<br>Probe CAAGCTGGTCTCTCCAAGTGGAA         |
| <i>G6pd2</i>    | Forward AAGAATGAACGGTGGGATGG<br>Reverse GGAAGATGTCGCCTGGTATATC<br>Probe CGCAAAGCTGAAGTGAGACTGCAA   |
| <i>Cidea</i>    | Forward CACGCATTTTCATGATCTTGG<br>Reverse CCTGTATAGGTGGAAGGTGA<br>Probe TTACTACCCGGTGTCCATTTCTGTCC  |
| <i>Elovl3</i>   | Forward TGCTTTGCCATCTACACG<br>Reverse CAGTGGACAAAGATGAGTGG<br>Probe TGAAGTGGGAGACACGGCCTT          |
| <i>Cd36</i>     | Forward GCGACATGATTAATGGCACAG<br>Reverse GATCCGAACACAGCGTAGATAG<br>Probe CAACAAAAGGTGGAAAGGAGGCTGC |
| <i>Lpl</i>      | Forward GCCATGACAAGTCTCTGAAG<br>Reverse CTTTCAAACACCCAAACAAGG<br>Probe AGTCTGGCTGACACTGGACAAACA    |
| <i>Idh3a</i>    | Forward ACGGAAGGAGAATACAGTGG<br>Reverse GTACTCGAAGGCAAACCTCTG<br>Probe ACCCCATCAACGATCACATGCTCA    |
| <i>Bckdhb</i>   | Forward TGGGATGTGGATAACAGTTTGC<br>Reverse TCGAGATATTGGAGCCTCTAGG<br>Probe AGTCGCCCCGGTTTTGATCACAGA |
| <i>Cox7a1</i>   | Forward TGTGGCAGAGAAGCAGAAG<br>Reverse AGCCCAAGCAGTATAAGCAG<br>Probe CGACAATGACCTCCCAGTACACTGA     |
| <i>Pparg1a</i>  | Forward CATTTGATGCACTGACAGATGGA<br>Reverse GTCAGGCATGGAGGAAGGAC<br>Probe CCGTGACCACTGACA ACGAGGCC  |
| <i>Adipoq</i>   | Forward AGGCATCCCAGGACATC<br>Reverse CCTGTCATTCCAACATCTCC                                          |

|                  |                                                                                                   |
|------------------|---------------------------------------------------------------------------------------------------|
|                  | Probe CCTTAGGACCAAGAAGACCTGCATCTC                                                                 |
| <i>Plin</i>      | Forward ACAGACACAGAGGGAGAGG<br>Reverse AGTGTCTGCACGGTGTG<br>Probe AGGAGGAAGAAGAGTCCGAGGCT         |
| <i>Retn</i>      | Forward GGCTTAAATTGCTGGACAGTC<br>Reverse TCTATCCTTGACACTGGC<br>Probe TGGCTCGTGGGACATTCGTGAAG      |
| <i>Edrna</i>     | Forward GTCTTGAACCTCTGTGCTCTC<br>Reverse GATCCCGATTCTTGAACCTCG<br>Probe CCACTGCTCTGTACCTGTCCACAC  |
| <i>Psat1</i>     | Forward TGGAACGGTGAACATTGTCC<br>Reverse GTCAGGTACGAAGTCAAACCTCC<br>Probe AAGCACCTGGAACCTCAACCCG   |
| <i>Serpina3k</i> | Forward CAGAAACCAAGAAACTGAGTGTG<br>Reverse GGAATGGCCTGTTGAAATGC<br>Probe ACGAATGCCACCAATAACCCCTGT |
| <i>Acss2</i>     | Forward ACCAGTTAAGAGGCCATGTC<br>Reverse GTACAAGATGAAGAGTGGGTCC<br>Probe AGGCAGGAGACGAGTGTGAGC     |
| <i>Fabp4</i>     | Forward GCGTGGAATTCGATGAA<br>Reverse GCTTGTACCATCTCGTT<br>Probe TGATGCTCTTCACCTTCTGTCTGT          |
| <i>Cebpa</i>     | Forward AGAGCCGAGATAAAGCCAAAC<br>Reverse TCATTGTCACCTGGTCAACTCC<br>Probe AGCACCTTCTGTTGCGTCTCCA   |
| <i>Vegfa2</i>    | Forward GGAATCCCAGAAACAACCCTAAT<br>Reverse GACTGGATTTCGCCATTTTCTTATATC                            |

## Supplementary Table 4

### PRIMERS for ChIP

| Gene                  | Sequences                                                          |
|-----------------------|--------------------------------------------------------------------|
| <i>Pparg enhancer</i> | Forward TGAGGCAGACAGGACTGAAAGTGG<br>Reverse TGGTGCCCATCTGGAAGGCTGC |
| <i>Ucp1 -13kb</i>     | Forward GCAACCCTCTCCCATCAGTG<br>Reverse GCCTAACACCGTGCTTCTCA       |
| <i>Ucp1 -5kb</i>      | Forward TGCAACCCCTCACCTTTTAC<br>Reverse CTCCTTCCATCATCCCTTCA       |
| <i>Ppara -15kb</i>    | Forward AGTGAGCGCCATGATACCAC<br>Reverse ATGGCTGGGCCAGGATAATG       |
| <i>Ppara -11kb</i>    | Forward CAGGGTGGAGGGAAACTCTC<br>Reverse TGGCTTTACCTCCTTGGGAC       |
| <i>Ppara -3.5kb</i>   | Forward AAGCAGGGTGCTTTGACCTT                                       |



|                         |                                                                      |
|-------------------------|----------------------------------------------------------------------|
|                         | Reverse TCTGCTAGGAAACTGCTGCC                                         |
| <i>Ppara -1.6kb</i>     | Forward GTAAGCAGCCTCCAGCCATT<br>Reverse CCTGAATGGCCCAGGGGATA         |
| <i>Negative control</i> | Forward ACTGTGCCAAACTTTGAGGGAAGG<br>Reverse TAGGGTGGGAGATGAGTGAGTGAA |

## Supplementary Table 5

DAVID analysis

|                                  |                                                              |                                                 |             |          |
|----------------------------------|--------------------------------------------------------------|-------------------------------------------------|-------------|----------|
| 1354 annotated genes out of 1429 |                                                              |                                                 |             |          |
| <b>Annotation Cluster 1</b>      | <b>Mitochondrion</b>                                         | <b>Enrichment Score:<br/>23.76055310378521\</b> |             |          |
| Category                         | Term                                                         | Count                                           | %           | PValue   |
| UP_KEYWORDS                      | Mitochondrion                                                | 169                                             | 12.48153619 | 3.98E-34 |
| GOTERM_CC_DIRECT                 | GO:0005739~mitochondrion                                     | 224                                             | 16.54357459 | 3.61E-27 |
| UP_KEYWORDS                      | Transit peptide                                              | 89                                              | 6.573116691 | 1.66E-20 |
| UP_SEQ_FEATURE                   | transit peptide:Mitochondrion                                | 85                                              | 6.277695716 | 3.79E-16 |
| \                                |                                                              |                                                 |             |          |
| <b>Annotation Cluster 2</b>      | <b>Endoplasmic reticulum</b>                                 | <b>Enrichment Score:<br/>7.366942941152303\</b> |             |          |
| Category                         | Term                                                         | Count                                           | %           | PValue   |
| UP_KEYWORDS                      | Metal binding                                                | 105                                             | 7.754800591 | 1.87E-09 |
| GOTERM_CC_DIRECT                 | GO:0005783~endoplasmic reticulum                             | 133                                             | 9.822747415 | 5.19E-08 |
| GOTERM_CC_DIRECT                 | GO:0005789~endoplasmic reticulum membrane                    | 79                                              | 5.834564254 | 8.17E-07 |
| \                                |                                                              |                                                 |             |          |
| <b>Annotation Cluster 3</b>      | <b>metal binding</b>                                         | <b>Enrichment Score:<br/>6.55765609288561\</b>  |             |          |
| Category                         | Term                                                         | Count                                           | %           | PValue   |
| UP_KEYWORDS                      | Metal-binding                                                | 282                                             | 20.82717873 | 4.83E-11 |
| GOTERM_MF_DIRECT                 | GO:0046872~metal ion binding                                 | 287                                             | 21.19645495 | 5.33E-09 |
| UP_KEYWORDS                      | Zinc-finger                                                  | 146                                             | 10.78286558 | 8.23E-09 |
| UP_KEYWORDS                      | Zinc                                                         | 181                                             | 13.36779911 | 3.18E-08 |
| GOTERM_MF_DIRECT                 | GO:0003676~nucleic acid binding                              | 125                                             | 9.231905465 | 6.44E-08 |
| SMART                            | SM00349:KRAB                                                 | 48                                              | 3.545051699 | 5.78E-07 |
| INTERPRO                         | IPR001909:Krueppel-associated box                            | 48                                              | 3.545051699 | 1.58E-06 |
| INTERPRO                         | IPR013087:Zinc finger C2H2-type/integrase DNA-binding domain | 68                                              | 5.022156573 | 1.67E-05 |
| SMART                            | SM00355:ZnF_C2H2                                             | 70                                              | 5.169867061 | 1.69E-05 |
| INTERPRO                         | IPR007087:Zinc finger, C2H2                                  | 74                                              | 5.465288035 | 1.97E-05 |

|                             |                                                        |                            |             |             |
|-----------------------------|--------------------------------------------------------|----------------------------|-------------|-------------|
| INTERPRO                    | IPR015880:Zinc finger, C2H2-like                       | 70                         | 5.169867061 | 3.33E-05    |
| \                           |                                                        |                            |             |             |
| <b>Annotation Cluster 4</b> | <b>Protein transport</b>                               | <b>Enrichment Score:</b>   |             |             |
|                             |                                                        | <b>5.223334786900093\</b>  |             |             |
| Category                    | Term                                                   | Count                      | %           | PValue      |
| UP_KEYWORDS                 | Protein transport                                      | 64                         | 4.726735598 | 8.44E-07    |
| UP_KEYWORDS                 | Transport                                              | 159                        | 11.74298375 | 1.62E-06    |
| GOTERM_BP_DIRECT            | GO:0015031~protein transport                           | 66                         | 4.874446086 | 7.46E-06    |
| GOTERM_BP_DIRECT            | GO:0006810~transport                                   | 153                        | 11.29985229 | 1.25E-04    |
| \                           |                                                        |                            |             |             |
| <b>Annotation Cluster 5</b> | <b>Peroxisome</b>                                      | <b>Enrichment Score:</b>   |             |             |
|                             |                                                        | <b>4.832144318061019\</b>  |             |             |
| Category                    | Term                                                   | Count                      | %           | PValue      |
| UP_KEYWORDS                 | Peroxisome                                             | 23                         | 1.698670606 | 1.29E-07    |
| GOTERM_CC_DIRECT            | GO:0005777~peroxisome                                  | 27                         | 1.994091581 | 1.44E-07    |
| KEGG_PATHWAY                | mmu04146:Peroxisome                                    | 19                         | 1.403249631 | 2.86E-06    |
| GOTERM_CC_DIRECT            | GO:0005778~peroxisomal membrane                        | 11                         | 0.812407681 | 0.001656165 |
| UP_SEQ_FEATURE              | short sequence motif:Microbody targeting signal        | 9                          | 0.664697194 | 0.007872572 |
| \                           |                                                        |                            |             |             |
| <b>Annotation Cluster 6</b> | <b>Fatty acid metabolism</b>                           | <b>Enrichment Score:</b>   |             |             |
|                             |                                                        | <b>4.5588316711046275\</b> |             |             |
| Category                    | Term                                                   | Count                      | %           | PValue      |
| UP_KEYWORDS                 | Lipid metabolism                                       | 54                         | 3.988183161 | 5.28E-08    |
| GOTERM_BP_DIRECT            | GO:0006631~fatty acid metabolic process                | 30                         | 2.215657312 | 1.19E-07    |
| KEGG_PATHWAY                | mmu01212:Fatty acid metabolism                         | 16                         | 1.1816839   | 3.02E-07    |
| UP_KEYWORDS                 | Fatty acid metabolism                                  | 24                         | 1.772525849 | 6.58E-07    |
| GOTERM_BP_DIRECT            | GO:0006629~lipid metabolic process                     | 57                         | 4.209748892 | 1.46E-06    |
| GOTERM_BP_DIRECT            | GO:0006633~fatty acid biosynthetic process             | 16                         | 1.1816839   | 2.78E-05    |
| KEGG_PATHWAY                | mmu03320:PPAR signaling pathway                        | 15                         | 1.107828656 | 4.09E-04    |
| UP_KEYWORDS                 | Fatty acid biosynthesis                                | 11                         | 0.812407681 | 0.001048132 |
| KEGG_PATHWAY                | mmu01040:Biosynthesis of unsaturated fatty acids       | 8                          | 0.59084195  | 0.001103201 |
| KEGG_PATHWAY                | mmu00071:Fatty acid degradation                        | 9                          | 0.664697194 | 0.010678542 |
| GOTERM_BP_DIRECT            | GO:0006636~unsaturated fatty acid biosynthetic process | 4                          | 0.295420975 | 0.027838175 |
| \                           |                                                        |                            |             |             |
| <b>Annotation Cluster 7</b> | <b>GTPase activity</b>                                 | <b>Enrichment Score:</b>   |             |             |
|                             |                                                        | <b>4.181853442410703\</b>  |             |             |

| Category                     | Term                                                          | Count                      | %           | PValue      |
|------------------------------|---------------------------------------------------------------|----------------------------|-------------|-------------|
| GOTERM_MF_DIRECT             | GO:0003924~GTPase activity                                    | 40                         | 2.954209749 | 1.00E-09    |
| GOTERM_MF_DIRECT             | GO:0005525~GTP binding                                        | 58                         | 4.283604136 | 1.39E-09    |
| UP_KEYWORDS                  | GTP-binding                                                   | 50                         | 3.692762186 | 1.75E-09    |
| INTERPRO                     | IPR005225:Small GTP-binding protein domain                    | 30                         | 2.215657312 | 2.63E-07    |
| UP_SEQ_FEATURE               | nucleotide phosphate-binding region:GTP                       | 44                         | 3.249630724 | 4.52E-06    |
| GOTERM_MF_DIRECT             | GO:0019003~GDP binding                                        | 15                         | 1.107828656 | 1.92E-05    |
| INTERPRO                     | IPR027417:P-loop containing nucleoside triphosphate hydrolase | 87                         | 6.425406204 | 2.89E-05    |
| GOTERM_BP_DIRECT             | GO:0007264~small GTPase mediated signal transduction          | 30                         | 2.215657312 | 5.82E-04    |
| UP_KEYWORDS                  | Prenylation                                                   | 18                         | 1.329394387 | 0.010223033 |
| UP_SEQ_FEATURE               | short sequence motif:Effector region                          | 14                         | 1.033973412 | 0.01285581  |
| INTERPRO                     | IPR001806:Small GTPase superfamily                            | 16                         | 1.1816839   | 0.017883478 |
| INTERPRO                     | IPR020849:Small GTPase superfamily, Ras type                  | 6                          | 0.443131462 | 0.092287316 |
| UP_SEQ_FEATURE               | lipid moiety-binding region:S-geranylgeranyl cysteine         | 11                         | 0.812407681 | 0.17917441  |
| UP_SEQ_FEATURE               | propeptide:Removed in mature form                             | 14                         | 1.033973412 | 0.782180297 |
| \                            |                                                               |                            |             |             |
| <b>Annotation Cluster 8</b>  | <b>Oxidoreductase activity</b>                                | <b>Enrichment Score:</b>   |             |             |
|                              |                                                               | <b>3.6368116796106165\</b> |             |             |
| Category                     | Term                                                          | Count                      | %           | PValue      |
| GOTERM_BP_DIRECT             | GO:0055114~oxidation-reduction process                        | 73                         | 5.391432792 | 7.51E-06    |
| GOTERM_MF_DIRECT             | GO:0016491~oxidoreductase activity                            | 60                         | 4.431314623 | 5.29E-04    |
| UP_KEYWORDS                  | Oxidoreductase                                                | 55                         | 4.062038405 | 0.003094525 |
| \                            |                                                               |                            |             |             |
| <b>Annotation Cluster 9</b>  | <b>Transcription regulation</b>                               | <b>Enrichment Score:</b>   |             |             |
|                              |                                                               | <b>3.2380146999358397\</b> |             |             |
| Category                     | Term                                                          | Count                      | %           | PValue      |
| GOTERM_BP_DIRECT             | GO:0006355~regulation of transcription, DNA-templated         | 198                        | 14.62333826 | 1.16E-06    |
| UP_KEYWORDS                  | Transcription                                                 | 153                        | 11.29985229 | 4.93E-06    |
| UP_KEYWORDS                  | Transcription regulation                                      | 143                        | 10.56129985 | 5.93E-05    |
| GOTERM_BP_DIRECT             | GO:0006351~transcription, DNA-templated                       | 154                        | 11.37370753 | 4.79E-04    |
| UP_KEYWORDS                  | DNA-binding                                                   | 95                         | 7.016248154 | 0.452440958 |
| GOTERM_MF_DIRECT             | GO:0003677~DNA binding                                        | 118                        | 8.714918759 | 0.507087523 |
| \                            |                                                               |                            |             |             |
| <b>Annotation Cluster 10</b> | <b>Respiratory chain</b>                                      | <b>Enrichment Score:</b>   |             |             |
|                              |                                                               | <b>3.203202459440069\</b>  |             |             |

| Category                     | Term                                                 | Count                      | %           | PValue      |
|------------------------------|------------------------------------------------------|----------------------------|-------------|-------------|
| UP_KEYWORDS                  | Electron transport                                   | 23                         | 1.698670606 | 2.16E-07    |
| UP_KEYWORDS                  | Respiratory chain                                    | 13                         | 0.960118168 | 2.54E-04    |
| KEGG_PATHWAY                 | mmu05010:Alzheimer's disease                         | 25                         | 1.846381093 | 2.80E-04    |
| KEGG_PATHWAY                 | mmu04932:Non-alcoholic fatty liver disease (NAFLD)   | 23                         | 1.698670606 | 3.13E-04    |
| KEGG_PATHWAY                 | mmu05012:Parkinson's disease                         | 22                         | 1.624815362 | 3.93E-04    |
| KEGG_PATHWAY                 | mmu00190:Oxidative phosphorylation                   | 20                         | 1.477104874 | 0.001072875 |
| KEGG_PATHWAY                 | mmu05016:Huntington's disease                        | 25                         | 1.846381093 | 0.001433721 |
| GOTERM_CC_DIRECT             | GO:0070469~respiratory chain                         | 11                         | 0.812407681 | 0.00288201  |
| GOTERM_MF_DIRECT             | GO:0008137~NADH dehydrogenase (ubiquinone) activity  | 8                          | 0.59084195  | 0.006358906 |
| GOTERM_CC_DIRECT             | GO:0005747~mitochondrial respiratory chain complex I | 9                          | 0.664697194 | 0.010261158 |
| UP_KEYWORDS                  | Ubiquinone                                           | 6                          | 0.443131462 | 0.010631668 |
| \                            |                                                      |                            |             |             |
| <b>Annotation Cluster 11</b> | <b>Cell cycle</b>                                    | <b>Enrichment Score:</b>   |             |             |
|                              |                                                      | <b>3.0513120475475075\</b> |             |             |
| Category                     | Term                                                 | Count                      | %           | PValue      |
| UP_KEYWORDS                  | Cell cycle                                           | 69                         | 5.096011817 | 3.75E-07    |
| GOTERM_BP_DIRECT             | GO:0007049~cell cycle                                | 67                         | 4.948301329 | 1.21E-05    |
| UP_KEYWORDS                  | Cell division                                        | 36                         | 2.658788774 | 0.002889163 |
| GOTERM_BP_DIRECT             | GO:0051301~cell division                             | 37                         | 2.732644018 | 0.007138631 |
| GOTERM_BP_DIRECT             | GO:0007067~mitotic nuclear division                  | 25                         | 1.846381093 | 0.072471944 |
| UP_KEYWORDS                  | Mitosis                                              | 22                         | 1.624815362 | 0.072686318 |
| \                            |                                                      |                            |             |             |
| <b>Annotation Cluster 12</b> | <b>protein kinase</b>                                | <b>Enrichment Score:</b>   |             |             |
|                              |                                                      | <b>2.6892143859067703\</b> |             |             |
| Category                     | Term                                                 | Count                      | %           | PValue      |
| UP_KEYWORDS                  | Nucleotide-binding                                   | 175                        | 12.92466765 | 5.29E-13    |
| GOTERM_MF_DIRECT             | GO:0000166~nucleotide binding                        | 197                        | 14.54948301 | 3.02E-12    |
| UP_KEYWORDS                  | ATP-binding                                          | 121                        | 8.93648449  | 1.95E-06    |
| UP_KEYWORDS                  | Transferase                                          | 136                        | 10.04431315 | 5.36E-06    |
| GOTERM_MF_DIRECT             | GO:0016740~transferase activity                      | 124                        | 9.158050222 | 2.92E-04    |
| GOTERM_MF_DIRECT             | GO:0005524~ATP binding                               | 128                        | 9.453471196 | 3.54E-04    |
| UP_KEYWORDS                  | Kinase                                               | 58                         | 4.283604136 | 0.006483469 |
| GOTERM_MF_DIRECT             | GO:0016301~kinase activity                           | 58                         | 4.283604136 | 0.013110458 |
| GOTERM_BP_DIRECT             | GO:0018105~peptidyl-serine phosphorylation           | 16                         | 1.1816839   | 0.019760474 |

|                              |                                                        |                            |             |             |
|------------------------------|--------------------------------------------------------|----------------------------|-------------|-------------|
| UP_KEYWORDS                  | Serine/threonine-protein kinase                        | 34                         | 2.511078287 | 0.029999489 |
| UP_SEQ_FEATURE               | nucleotide phosphate-binding region:ATP                | 78                         | 5.76070901  | 0.035732122 |
| GOTERM_MF_DIRECT             | GO:0004674~protein serine/threonine kinase activity    | 37                         | 2.732644018 | 0.049675546 |
| GOTERM_BP_DIRECT             | GO:0016310~phosphorylation                             | 49                         | 3.618906942 | 0.061652446 |
| SMART                        | SM00220:S_TKc                                          | 31                         | 2.289512555 | 0.076884921 |
| INTERPRO                     | IPR011009:Protein kinase-like domain                   | 43                         | 3.17577548  | 0.084327303 |
| GOTERM_MF_DIRECT             | GO:0004672~protein kinase activity                     | 42                         | 3.101920236 | 0.098783044 |
| UP_SEQ_FEATURE               | active site:Proton acceptor                            | 56                         | 4.135893648 | 0.099649944 |
| UP_SEQ_FEATURE               | binding site:ATP                                       | 47                         | 3.471196455 | 0.101355011 |
| INTERPRO                     | IPR017441:Protein kinase, ATP binding site             | 31                         | 2.289512555 | 0.118227306 |
| GOTERM_BP_DIRECT             | GO:0006468~protein phosphorylation                     | 43                         | 3.17577548  | 0.172264963 |
| INTERPRO                     | IPR000719:Protein kinase, catalytic domain             | 37                         | 2.732644018 | 0.210341314 |
| INTERPRO                     | IPR008271:Serine/threonine-protein kinase, active site | 25                         | 1.846381093 | 0.222814306 |
| UP_SEQ_FEATURE               | domain:Protein kinase                                  | 38                         | 2.806499261 | 0.239762492 |
| \                            |                                                        |                            |             |             |
| <b>Annotation Cluster 13</b> | <b>B and T cell homeostasis</b>                        | <b>Enrichment Score:</b>   |             |             |
|                              |                                                        | <b>2.661611831517772\</b>  |             |             |
| Category                     | Term                                                   | Count                      | %           | PValue      |
| GOTERM_BP_DIRECT             | GO:0001782~B cell homeostasis                          | 9                          | 0.664697194 | 3.08E-04    |
| GOTERM_BP_DIRECT             | GO:0043029~T cell homeostasis                          | 9                          | 0.664697194 | 5.06E-04    |
| GOTERM_BP_DIRECT             | GO:0048536~spleen development                          | 7                          | 0.516986706 | 0.066372161 |
| \                            |                                                        |                            |             |             |
| <b>Annotation Cluster 14</b> | <b>DnaJ domain</b>                                     | <b>Enrichment Score:</b>   |             |             |
|                              |                                                        | <b>2.6303783295145013\</b> |             |             |
| Category                     | Term                                                   | Count                      | %           | PValue      |
| INTERPRO                     | IPR001623:DnaJ domain                                  | 11                         | 0.812407681 | 9.86E-04    |
| SMART                        | SM00271:DnaJ                                           | 10                         | 0.738552437 | 0.002245917 |
| UP_SEQ_FEATURE               | domain:J                                               | 11                         | 0.812407681 | 0.0034484   |
| INTERPRO                     | IPR018253:DnaJ domain, conserved site                  | 7                          | 0.516986706 | 0.003942567 |
| \                            |                                                        |                            |             |             |
| <b>Annotation Cluster 15</b> | <b>circadian rhythm</b>                                | <b>Enrichment Score:</b>   |             |             |
|                              |                                                        | <b>2.4301788330605674\</b> |             |             |
| Category                     | Term                                                   | Count                      | %           | PValue      |
| UP_KEYWORDS                  | Biological rhythms                                     | 19                         | 1.403249631 | 3.20E-04    |
| GOTERM_BP_DIRECT             | GO:0048511~rhythmic                                    | 19                         | 1.403249631 | 0.001063538 |

|                              |                                                           |                            |             |             |
|------------------------------|-----------------------------------------------------------|----------------------------|-------------|-------------|
|                              | process                                                   |                            |             |             |
| GOTERM_BP_DIRECT             | GO:0032922~circadian regulation of gene expression        | 12                         | 0.886262925 | 0.001500372 |
| GOTERM_BP_DIRECT             | GO:0042752~regulation of circadian rhythm                 | 10                         | 0.738552437 | 0.004676383 |
| GOTERM_MF_DIRECT             | GO:0001046~core promoter sequence-specific DNA binding    | 9                          | 0.664697194 | 0.006385009 |
| GOTERM_BP_DIRECT             | GO:0007623~circadian rhythm                               | 11                         | 0.812407681 | 0.17194579  |
| \                            |                                                           |                            |             |             |
| <b>Annotation Cluster 16</b> | <b>Protein biosynthesis</b>                               | <b>Enrichment Score:</b>   |             |             |
|                              |                                                           | <b>2.393365903873608\</b>  |             |             |
| Category                     | Term                                                      | Count                      | %           | PValue      |
| GOTERM_BP_DIRECT             | GO:0006413~translational initiation                       | 13                         | 0.960118168 | 1.04E-04    |
| UP_KEYWORDS                  | Protein biosynthesis                                      | 22                         | 1.624815362 | 1.29E-04    |
| UP_KEYWORDS                  | Initiation factor                                         | 11                         | 0.812407681 | 0.004271362 |
| GOTERM_MF_DIRECT             | GO:0003743~translation initiation factor activity         | 11                         | 0.812407681 | 0.011748716 |
| GOTERM_BP_DIRECT             | GO:0001731~formation of translation preinitiation complex | 6                          | 0.443131462 | 0.017922032 |
| BIOCARTA                     | m_eifPathway:Eukaryotic protein translation               | 4                          | 0.295420975 | 0.038123658 |
| KEGG_PATHWAY                 | mmu03013:RNA transport                                    | 18                         | 1.329394387 | 0.038606828 |
| \                            |                                                           |                            |             |             |
| <b>Annotation Cluster 17</b> | <b>Ubiquitin conjugating enzyme activity</b>              | <b>Enrichment Score:</b>   |             |             |
|                              |                                                           | <b>2.2875065201924296\</b> |             |             |
| Category                     | Term                                                      | Count                      | %           | PValue      |
| KEGG_PATHWAY                 | mmu04120:Ubiquitin mediated proteolysis                   | 23                         | 1.698670606 | 7.01E-05    |
| INTERPRO                     | IPR016135:Ubiquitin-conjugating enzyme/RWD-like           | 12                         | 0.886262925 | 7.35E-04    |
| GOTERM_MF_DIRECT             | GO:0061631~ubiquitin conjugating enzyme activity          | 9                          | 0.664697194 | 8.02E-04    |
| INTERPRO                     | IPR000608:Ubiquitin-conjugating enzyme, E2                | 9                          | 0.664697194 | 0.005148016 |
| INTERPRO                     | IPR023313:Ubiquitin-conjugating enzyme, active site       | 7                          | 0.516986706 | 0.008270018 |
| UP_SEQ_FEATURE               | active site:Glycyl thioester intermediate                 | 12                         | 0.886262925 | 0.017008786 |
| GOTERM_BP_DIRECT             | GO:0070936~protein K48-linked ubiquitination              | 7                          | 0.516986706 | 0.078396043 |
| GOTERM_BP_DIRECT             | GO:0070534~protein K63-linked ubiquitination              | 5                          | 0.369276219 | 0.21379371  |
| \                            |                                                           |                            |             |             |

| <b>Annotation Cluster 18</b> | <b>IFN<math>\gamma</math> signaling</b>                         | <b>Enrichment Score:<br/>2.245719658194264\</b> |             |             |
|------------------------------|-----------------------------------------------------------------|-------------------------------------------------|-------------|-------------|
| Category                     | Term                                                            | Count                                           | %           | PValue      |
| INTERPRO                     | IPR003191:Guanylate-binding protein, C-terminal                 | 8                                               | 0.59084195  | 6.94E-06    |
| INTERPRO                     | IPR015894:Guanylate-binding protein, N-terminal                 | 8                                               | 0.59084195  | 1.23E-05    |
| GOTERM_CC_DIRECT             | GO:0020005~symbiont-containing vacuole membrane                 | 4                                               | 0.295420975 | 0.015292408 |
| GOTERM_BP_DIRECT             | GO:0042832~defense response to protozoan                        | 6                                               | 0.443131462 | 0.042111009 |
| GOTERM_BP_DIRECT             | GO:0071346~cellular response to interferon-gamma                | 9                                               | 0.664697194 | 0.062076509 |
| GOTERM_BP_DIRECT             | GO:0044406~adhesion of symbiont to host                         | 3                                               | 0.221565731 | 0.126785567 |
| GOTERM_BP_DIRECT             | GO:0050830~defense response to Gram-positive bacterium          | 8                                               | 0.59084195  | 0.439693854 |
| \                            |                                                                 |                                                 |             |             |
| <b>Annotation Cluster 19</b> | <b>Cell red-ox homeostasis</b>                                  | <b>Enrichment Score:<br/>2.204614817771445\</b> |             |             |
| Category                     | Term                                                            | Count                                           | %           | PValue      |
| GOTERM_BP_DIRECT             | GO:0045454~cell redox homeostasis                               | 13                                              | 0.960118168 | 5.55E-04    |
| UP_KEYWORDS                  | Redox-active center                                             | 10                                              | 0.738552437 | 0.00147269  |
| GOTERM_MF_DIRECT             | GO:0003756~protein disulfide isomerase activity                 | 6                                               | 0.443131462 | 0.006810197 |
| UP_SEQ_FEATURE               | domain:Thioredoxin                                              | 8                                               | 0.59084195  | 0.008971994 |
| INTERPRO                     | IPR013766:Thioredoxin domain                                    | 8                                               | 0.59084195  | 0.010825789 |
| INTERPRO                     | IPR017937:Thioredoxin, conserved site                           | 5                                               | 0.369276219 | 0.016914131 |
| INTERPRO                     | IPR012336:Thioredoxin-like fold                                 | 15                                              | 1.107828656 | 0.040382003 |
| \                            |                                                                 |                                                 |             |             |
| <b>Annotation Cluster 20</b> | <b>Protein deubiquitination</b>                                 | <b>Enrichment Score:<br/>2.179995156825928\</b> |             |             |
| Category                     | Term                                                            | Count                                           | %           | PValue      |
| GOTERM_BP_DIRECT             | GO:0071108~protein K48-linked deubiquitination                  | 8                                               | 0.59084195  | 3.79E-04    |
| GOTERM_MF_DIRECT             | GO:0004843~thiol-dependent ubiquitin-specific protease activity | 15                                              | 1.107828656 | 4.80E-04    |
| GOTERM_MF_DIRECT             | GO:0036459~thiol-dependent ubiquitinyl hydrolase activity       | 13                                              | 0.960118168 | 0.002101143 |
| UP_KEYWORDS                  | Thiol protease                                                  | 16                                              | 1.1816839   | 0.007319498 |
| GOTERM_BP_DIRECT             | GO:0016579~protein deubiquitination                             | 11                                              | 0.812407681 | 0.02366881  |
| GOTERM_MF_DIRECT             | GO:0008234~cysteine-type peptidase activity                     | 16                                              | 1.1816839   | 0.026801066 |

|          |                                                                                  |   |            |             |
|----------|----------------------------------------------------------------------------------|---|------------|-------------|
| INTERPRO | IPR018200:Peptidase C19, ubiquitin carboxyl-terminal hydrolase 2, conserved site | 8 | 0.59084195 | 0.039808582 |
| INTERPRO | IPR001394:Peptidase C19, ubiquitin carboxyl-terminal hydrolase 2                 | 8 | 0.59084195 | 0.051337672 |

### Supplementary Table 6

List of primary antibodies used for protein expression analysis

| <b>Protein</b>         | <b>Antibody cat. no</b> | <b>Dilution</b> |
|------------------------|-------------------------|-----------------|
| HDAC3                  | sc-11417, Santa Cruz    | 1:500           |
| ATGL                   | #21385, Cell Signaling  | 1:1000          |
| ACADL                  | ab82853, Abcam          | 1:250           |
| UCP1                   | ab10983, Abcam          | 1:1000          |
| p293Ser-PDHE1 $\alpha$ | ABS204, Merck Millipore | 1:1000          |
| p300Ser-PDHE1 $\alpha$ | ABS194, Merck Millipore | 1:1000          |
| total PDHE1 $\alpha$   | ab110330, Abcam         | 1:1500          |
| ACLY                   | ab61762, Abcam          | 1:500           |
| ACSS2                  | ab66038, Abcam          | 1:1000          |
| HSP90 $\alpha/\beta$   | sc-69703, Santa Cruz    | 1:500           |
| $\alpha$ -TUBULIN      | T9025, Sigma            | 1:5000          |
| $\beta$ ACTIN          | A5441, Sigma            | 1:5000          |
| Histone H3             | 05-499, Upstate         | 1:500           |
| H3K27ac                | ab4729, Abcam           | 1:500           |
| pan-acetyl H3          | #43185, Cell Signaling  | 1:500           |
